# Supplementary material
Source: publisher figshare collection journal article supplement (https://wiley.figshare.com/ndownloader/files/12358652)
Supplement: Supplementary file 1 [file 12358652]

## Sheet: BodyWeight
Animal#	Condition (1=SAL; 4=LPS)	Sex (1=M; 2=F)	ExpDayBW	InjDayBW	NetChange	Spleen Wt	Experiment Type
15-2	4	1	21.1	23.7	-2.6	0.06949	Isolated
15-1	4	1	23.7	26.4	-2.7	0.07588	Isolated
16-6	4	1	23.9	26.2	-2.3	0.06679	Isolated
16-8	4	1	25.2	27.1	-1.9	0.067	Isolated
21-4	4	1	23.2	25.8	-2.6	0.07776	Isolated
21-6	4	1	23.7	25.5	-1.8		Isolated
23-1	4	1	19.7	22.3	-2.6	0.08369	Isolated
23-4	4	1	21.2	22.7	-1.5	0.07547	Isolated
24-1	4	1	19.8	22.5	-2.7	0.077	Isolated
24-3	4	1	19.8	22.2	-2.4	0.06676	Isolated
24-5	4	1	20.2	22.8	-2.6	0.063	Isolated
24-7	4	1	17.6	20.2	-2.6	0.05391	Isolated
9-6	4	2	17.3	19.3	-2	0.06485	Isolated
10-6	4	2	16	18	-2	0.05934	Isolated
25-4	4	2	16.2	18.7	-2.5	0.07577	Isolated
26-4	4	2	16.7	19.6	-2.9	0.06651	Isolated
29-2	4	2	16.3	17.1	-0.8	0.05867	Isolated
29-5	4	2	15.3	17.3	-2	0.06526	Isolated
29-6	4	2	16.4	18.3	-1.9		Isolated
30-4	4	2	15.8	17.7	-1.9	0.06674	Isolated
30-8	4	2	17.9	19.6	-1.7		Isolated
15-4	1	1		22.1		0.06006	Isolated
16-4	1	1	26	26.3	-0.3	0.0574	Isolated
23-2	1	1	20.5	21.2	-0.7	0.05184	Isolated
23-5	1	1	21.5	21.4	0.1	0.0555	Isolated
24-6	1	1	22.3	22.2	0.1	0.05518	Isolated
27-4	1	1	20.7	20.4	0.3		Isolated
27-8	1	1	22.5	22.3	0.2	0.04566	Isolated
28-2	1	1	19.9	19.9	0	0.056	Isolated
28-4	1	1	20.8	20.5	0.3	0.06276	Isolated
27-1	1	1	23.5	23.6	-0.1	0.06137	Isolated
28-6	1	1	20.6	20	0.6	0.05234	Isolated
9-4	1	2	19.2			0.072	Isolated
10-3	1	2	19.7	19.8	-0.1	0.06734	Isolated
25-2	1	2	19	19.4	-0.4	0.05487	Isolated
26-3	1	2	18.6	18.7	-0.1	0.05543	Isolated
29-3	1	2	18	16.1	1.9	0.07539	Isolated
29-4	1	2	16.7	15.9	0.8		Isolated
30-1	1	2	18.4	18.8	-0.4		Isolated
30-3	1	2	19	18.7	0.3	0.06521	Isolated
S1	1	2	18.2	18.4	-0.2		Isolated
S2	1	2	18.8	18.4	0.4		Isolated
S3	1	2	19.6	19.4	0.2		Isolated
L1	4	2	16	18.6	-2.6		Isolated
L3	4	2	17.1	18.7	-1.6		Isolated
L4	4	2	16.4	18.3	-1.9		Isolated
L5	4	2	18.1	20.4	-2.3		Isolated
32-1	1	1	20.2				Isolated
32-2	1	1	18.8	19.1	-0.3		Isolated
32-4	1	1	20	20.2	-0.2		Isolated
32-6	1	1	23.8	23.4	0.4		Isolated
32-7	1	1	20.3	19.1	1.2		Isolated
32-8	4	1	20.1	22.1	-2		Isolated
32-10	4	1	20.1	22.1	-2		Isolated
3-1	1	1	25.4	25.5	-0.1		FlowCyt
3-2	1	1	20.9	21.1	-0.2		FlowCyt
3-3	1	1	22.8	22.7	0.1		FlowCyt
3-4	4	1	19.6	21.4	-1.8		FlowCyt
3-5	4	1	21.2	23.1	-1.9		FlowCyt
3-6	4	1	22.1	23.4	-1.3		FlowCyt
4-1	1	2	19	19.3	-0.3		FlowCyt
4-2	1	2	20.6	20.7	-0.1		FlowCyt
4-3	1	2	18.8	19.8	-1		FlowCyt
4-4	4	2	18	20.2	-2.2		FlowCyt
4-5	4	2	18	20.6	-2.6		FlowCyt
4-6	4	2	17.8	20	-2.2		FlowCyt
11-1	1	1	24.1	24.5	-0.4	0.05826	FlowCyt
11-2	1	1	21.8	22	-0.2	0.05278	FlowCyt
11-3	1	1	22.7	22.3	0.4	0.05221	FlowCyt
11-4	1	1	23.8	23.8	0	0.05285	FlowCyt
11-5	4	1	24.9	28	-3.1	0.08367	FlowCyt
11-6	4	1	21.4	23.7	-2.3	0.06975	FlowCyt
11-7	4	1	23.3	25.6	-2.3	0.07373	FlowCyt
11-8	4	1	18.8	21.2	-2.4	0.0605	FlowCyt
12-1	1	2	21.3	21	0.3	0.06116	FlowCyt
12-2	1	2	22	21.7	0.3	0.07109	FlowCyt
12-3	1	2	20.3	20.5	-0.2	0.06943	FlowCyt
12-4	1	2	21.2	21.5	-0.3	0.07673	FlowCyt
12-5	4	2	16.2	18	-1.8	0.06552	FlowCyt
12-6	4	2	19.1	21.3	-2.2	0.09719	FlowCyt
12-7	4	2	18.6	20.6	-2	0.07982	FlowCyt
12-8	4	2	17.9	20.7	-2.8	0.08742	FlowCyt
17-1	1	2	20.3	20.2	0.1	0.07445	FlowCyt
17-2	1	2	19.8	19.2	0.6		FlowCyt
17-3	1	2	19.8	19.5	0.3	0.07016	FlowCyt
17-4	1	2	21.1	20.7	0.4	0.06992	FlowCyt
17-5	4	2	17.9	19.9	-2	0.09174	FlowCyt
17-6	4	2	17.2	18.9	-1.7	0.07571	FlowCyt
17-7	4	2	20.6	20.8	-0.2	0.08235	FlowCyt
17-8	4	2	17.5	19.5	-2	0.07477	FlowCyt
19-1	1	1	22.7	22.3	0.4	0.05313	FlowCyt
19-2	1	1	22.4	24.3	-1.9	0.05193	FlowCyt
19-3	1	1	24.5	22.3	2.2	0.06058	FlowCyt
19-4	1	1	24.9	24.6	0.3	0.06863	FlowCyt
19-5	4	1	20.6	20.6	0	0.06551	FlowCyt
19-6	4	1	18.6	22.4	-3.8	0.06291	FlowCyt
19-7	4	1	22.7	24.8	-2.1	0.0882	FlowCyt
19-8	4	1	24.3	24.6	-0.3	0.06582	FlowCyt
mouse 46	4	1	25.5	27.9	-2.4		HRefl
mouse 47	4	1	22.4	24.9	-2.5		HRefl
mouse 48	4	1	22.4	22.6	-0.2		HRefl
mouse 51	4	1	21.9	22.4	-0.5		HRefl
mouse 53	4	1	20.9	23.5	-2.6		HRefl
mouse 55	4	1	19.7	21.8	-2.1		HRefl
621A mou	4	1	22.44	25.61	-3.17		HRefl
949A mou	4	1	22.3	22.25	0.05		HRefl
mouse 45	4	1	22.1	24.4	-2.3		HRefl
949A mou	4	1	18.6	19.3	-0.7		HRefl
984B Mou	4	1	23.62	25.7	-2.08		HRefl
984B Mou	4	1	23.4	24.9	-1.5		HRefl
Mouse 34	1	1	23.8	23	0.8		HRefl
Mouse 35	1	1	23.2	23.6	-0.4		HRefl
Mouse 36	1	1	23.2	23.6	-0.4		HRefl
Mouse 38	1	1	22.5	22	0.5		HRefl
Mouse 39	1	1	21.5	22	-0.5		HRefl
Mouse 40	1	1	21.9	22.5	-0.6		HRefl
Mouse 41	1	1	22.4	22.9	-0.5		HRefl
Mouse 42	1	1	24.6	24.7	-0.1		HRefl
Mouse 49	1	1	23.1	22.7	0.4		HRefl
Mouse 50	1	1	22.2	22.7	-0.5		HRefl
621A mou	1	1	22.95	22.8	0.15		HRefl
970A mou	1	1	25.7	25.8	-0.1		HRefl
970A Mou	1	1	25.35	25.8	-0.45		HRefl
999A 5	1	2	18.1	18.4	-0.3		HRefl
999A 10	1	2	19.13	19.2	-0.07		HRefl
999A 1	1	2	19.6	19.2	0.4		HRefl
mouse 6	1	2	18.7	18.4	0.3		HRefl
mouse 5	1	2	19.4	19.1	0.3		HRefl
mouse 4	1	2	19.2	18.4	0.8		HRefl
mouse 2	1	2	17.8	18.1	-0.3		HRefl
999A Mou	1	2	16.75	16.8	-0.05		HRefl
mouse 8	1	2	16.9	18.7	-1.8		HRefl
Mouse 1	1	2	17.5	18	-0.5		HRefl
Mouse 3	1	2	17.6	17.7	-0.1		HRefl
Mouse 12	1	2	20	19.2	0.8		HRefl
Mouse 13	1	2	18.2	18.2	0		HRefl
Mouse 17	1	2	19	19.1	-0.1		HRefl
999A 8	4	2	15.61	18.4	-2.79		HRefl
Mouse 10	4	2	15.8	17.8	-2		HRefl
Mouse 11	4	2	16.5	18.5	-2		HRefl
Mouse 14	4	2	16	17.7	-1.7		HRefl
Mouse 15	4	2	17.4	19.2	-1.8		HRefl
Mouse 20	4	2	19.4	20.3	-0.9		HRefl
999A 7	4	2	15.6	18.08	-2.48		HRefl
mouse 7	4	2	17.3	19.4	-2.1		HRefl
mouse 9	4	2	15.6	16.9	-1.3		HRefl
mouse 16	4	2	17.4	19.3	-1.9		HRefl
mouse 18	4	2	18.9	20.6	-1.7		HRefl
mouse 19	4	2	16.4	18.7	-2.3		HRefl
mouse 99	4	2	16.9	19	-2.1		HRefl

## Sheet: Flow Cytometry Data
Experiment Number	Sex	Drug	Lymphocyte Concentration (cells/uL)	Neutrophil Concentration (cells/uL)	Monocyte Concentration (cells/uL)	White Blood Cell Concentration (cells/uL)
2	male	saline	4295	157	136	4858
2	male	saline	2573	159	70.2	3059
2	male	saline	3618	217	99.6	4154
2	male	LPS	226	1433	109	2324
2	male	LPS	378	529	91.1	1181
2	male	LPS	552	127	13.8	763
2	female	saline	2079	112	97.1	2479
2	female	saline	1132	64.1	32	1285
2	female	saline	3732	376	128	4494
2	female	LPS	343	355	60.5	887
2	female	LPS	189	671	35.3	1183
2	female	LPS	254	148	158	632
3	male	saline	3289	272	182	4753
3	male	saline	3832	542	315	5202
3	male	saline	5152	314	308	6186
3	male	saline	3891	174	212	4639
3	male	LPS	260	946	44.2	1846
3	male	LPS	103	845	26.3	1129
3	male	LPS	90.4	924	28.1	1137
3	male	LPS	125	1050	32.9	1397
3	female	saline	1356	180	96	1994
3	female	saline	4380	538	537	6700
3	female	saline	2293	282	172	3060
3	female	saline	4292	440	302	5730
3	female	LPS	394	356	33.5	828
3	female	LPS	498	496	41.4	1128
3	female	LPS	344	550	26.9	978
3	female	LPS	171	693	22.5	945
4	male	saline	2968	112	65.8	3276
4	male	saline	3608	385	160	4417
4	male	saline	3425	169	65.5	4066
4	male	saline	2020	808	253	3860
4	male	LPS	299	1370	24.8	2070
4	male	LPS	171	1138	7.81	1609
4	male	LPS	207	1154	10.5	1643
4	male	LPS	3324	784	186	4561
4	female	saline	5915	663	243	7160
4	female	saline	5001	433	252	5988
4	female	saline	3555	723	359	4846
4	female	saline	4004	520	173	4944
4	female	LPS	306	599	49.1	1032
4	female	LPS	134	587	23.2	752
4	female	LPS	2677	256	133	3324
4	female	LPS	174	640	33.3	888

## Sheet: Spindle Afferent Stretches
Animal#	Muscle#	Stretch Length (%Lo)	Condition	Sex	BL (imp/s)	DP (imp/s)	IST (imp/s)	FST (imp/s)	DI (imp/s)
9-4	2a	2.5	1	2	0	55.39	12.67	14	42.72
9-4	2a	5	1	2	0	62.12	22	15.33	40.12
9-4	2a	7.5	1	2	0	65.12	25	16	40.12
10-3	2a	5	1	2	0.7	40.95	25.33	20	15.62
10-3	2a	7.5	1	2	0.03	42.62	27.33	22	15.29
10-3	2a	2.5	1	2	1.83	37.05	21.33	17.33	15.72
25-2	1a	2.5	1	2	1.93	34.75	18	13.33	16.75
25-2	1a	5	1	2	1.73	48.23	22	16	26.23
25-2	1a	7.5	1	2	1.57	54.3	26.67	18	27.63
26-3	2a	2.5	1	2	9.33	28.25	19.33	16	8.92
26-3	2a	5	1	2	9.7	41.11	26.67	21.33	14.44
26-3	2a	7.5	1	2	10.3	49.67	33.33	25.33	16.34
29-3	1a	2.5	1	2	7	11.72	11.33	10	0.39
29-3	1a	5	1	2	6.37	15.5	11.33	10	4.17
29-3	1a	7.5	1	2	6.3	15.73	12.67	10	3.06
29-4	1b	2.5	1	2	7.63	52.77	28	20	24.77
29-4	1b	5	1	2	8.07	72.35	42	31.33	30.35
29-4	1b	7.5	1	2	8.03	87.9	55.33	38.67	32.57
30-1	2a	2.5	1	2	7.2	21.28	14.67	12	6.61
30-1	2a	5	1	2	6.93	27.55	18.67	15.33	8.88
30-3	1b	2.5	1	2	10.9	30.38	19.33	16	11.05
30-3	1b	5	1	2	9.8	33.58	22	19.33	11.58
30-3	1b	7.5	1	2	8.6	42.9	30	21.33	12.9
S2	2c	7.5	1	2	4.7	22.1	10	10	12.1
S2	2c	5	1	2	5.23	17.05	13.33	11.33	3.72
S2	2c	2.5	1	2	5.37	12.85	14	12	-1.15
S3	2b	2.5	1	2	11.17	60.75	26	20	34.75
S3	2b	5	1	2	10.37	71.78	32.67	24.67	39.11
S3	2b	7.5	1	2	9.93	77.02	38.67	27.33	38.35
S3	2a	2.5	1	2	0	85.26	39.33	34	45.93
S3	2a	7.5	1	2	0	111.33	52	45.33	59.33
S3	2a	5	1	2	0	102.67	58	47.33	44.67
S1	2a	2.5	1	2	10.6	34.02	23.33	20.67	10.69
S1	2a	5	1	2	9.93	50.5	32	25.33	18.5
S1	2a	7.5	1	2	9.57	61.68	40.67	32	21.01
S3	1b	2.5	1	2	2.6	86.62	38	28.67	48.62
S3	1b	5	1	2	1.07	102.7	56.67	40	46.03
S3	1b	7.5	1	2	0.37	112.41	66.67	52	45.74
S2	1b	2.5	1	2	6.8	13.78	12.67	10.67	1.11
S2	1b	5	1	2	6.27	24.73	17.33	14.67	7.4
S2	1b	7.5	1	2	6.03	31.02	20.67	18	10.35
S2	1a	2.5	1	2	14.1	34.23	18	16	16.23
S2	1a	7.5	1	2	13.57	42.12	18.67	18	23.45
S2	1a	5	1	2	13.63	40.04	20	18	20.04
2017-09-06	2a	2.5	4	2	13	71.27	38	31.33	33.27
2017-09-06	2a	5	4	2	10.73	85.34	52	38	33.34
2017-09-06	2a	7.5	4	2	0.13	102.54	52	33.33	50.54
26-3	1a	2.5	4	2	0.03	47.55	21.33	15.33	26.22
26-3	1a	5	4	2	0.03	51.56	24	18.67	27.56
26-3	1a	7.5	4	2	0	52.57	17.33	18.67	35.24
29-6	1b	5	4	2	0.03	31.82	19.33	14	12.49
29-6	1b	7.5	4	2	0	41.05	28	21.33	13.05
30-4	1c	2.5	4	2	0.3	31.47	16	10.67	15.47
30-4	1c	5	4	2	0.03	42.77	24	18	18.77
30-4	1c	7.5	4	2	0	56.5	33.33	24	23.17
30-8	2d	2.5	4	2	0	46.17	26	14.67	20.17
30-8	2d	5	4	2	0	65.16	43.33	29.33	21.83
30-8	2d	7.5	4	2	0	73.02	54.67	36.67	18.35
9-6	1a	2.5	4	2	20.83	40.49	26	24	14.49
9-6	1a	5	4	2	20.37	46.87	29.33	25.33	17.54
25-4	1d	2.5	4	2	12.87	68.81	49.33	38.67	19.48
25-4	1d	5	4	2	14.37	93.22	58	44	35.22
25-4	1d	7.5	4	2	15.9	107.15	74	56	33.15
26-4	2a	2.5	4	2	20.8	65.32	40	34	25.32
26-4	2a	5	4	2	17.9	87.26	56	44.67	31.26
26-4	2a	7.5	4	2	20.23	109.86	74.67	62	35.19
29-2	2a	2.5	4	2	10.37	12.44	12.67	10.67	-0.23
29-2	2a	5	4	2	10.4	20.52	14	12.67	6.52
29-2	2a	7.5	4	2	10.4	22.43	14.67	13.33	7.76
29-5	1b	2.5	4	2	8.17	22.29	14	10.67	8.29
29-5	1b	5	4	2	7.83	27.09	16.67	12.67	10.42
29-5	1b	7.5	4	2	7.4	27.21	16	14.67	11.21
29-5	1e	2.5	4	2	9.57	40.12	24	19.33	16.12
29-5	1e	5	4	2	8.93	49.88	29.33	22.67	20.55
29-5	1e	7.5	4	2	8.6	55.56	36	28	19.56
30-8	1b	2.5	4	2	5.23	31.21	21.33	17.33	9.88
30-8	1b	5	4	2	0.33	50.64	31.33	23.33	19.31
30-8	1b	7.5	4	2	1.1	61.05	38	29.33	23.05
30-8	2b	2.5	4	2	9.8	50.99	31.33	23.33	19.66
30-8	2b	5	4	2	9.2	79.59	52	40	27.59
30-8	2b	7.5	4	2	9.3	93.46	67.33	53.33	26.13
L1	2d	2.5	4	2	9.5	24.6	16	14.67	8.6
L1	2d	5	4	2	9.03	29.03	20	18	9.03
L1	2d	7.5	4	2	8.53	32.3	24	20	8.3
L5	2b	7.5	4	2	11.57	51.81	22.67	20	29.14
L5	2b	2.5	4	2	11.3	35.74	31.33	26.67	4.41
L5	2b	5	4	2	12.77	42.33	38	32	4.33
L3	2b	2.5	4	2	0	31.81	16	12.67	15.81
L3	2b	5	4	2	0	40.62	24	19.33	16.62
L3	2b	7.5	4	2	0	47.18	31.33	24.67	15.85
L5	2a	2.5	4	2	0	22.79	18	10.67	4.79
L5	2a	5	4	2	0	48.99	23.33	16.67	25.66
L5	2a	7.5	4	2	0	48.9	27.33	19.33	21.57
L1	1c	2.5	4	2	10.73	36.84	20	18	16.84
L1	1c	5	4	2	10.53	37.95	24	20	13.95
L1	1c	7.5	4	2	9.9	42.45	28	22.67	14.45
L5	1a	2.5	4	2	10.83	62.06	31.33	22	30.73
L5	1a	5	4	2	8.6	76.6	43.33	29.33	33.27
L5	1a	7.5	4	2	7.37	101.99	54.67	36	47.32
L4	1a	7.5	4	2	0	31.3	8	6	23.3
L4	1a	2.5	4	2	0	9.48	14.67	12	-5.19
L4	1a	5	4	2	0.1	29.63	15.33	12	14.3
L1	1a	2.5	4	2	13.13	23.32	18	14.67	5.32
L1	1a	5	4	2	12.53	45.38	22.67	18	22.71
L1	1a	7.5	4	2	10.87	48.12	24	18	24.12
16-4	2a	2.5	1	1	0	9.71	10	7	-0.29
16-4	2a	5	1	1	0	27.15	16.67	12.67	10.48
16-4	2a	7.5	1	1	0	47.68	41.33	29.33	6.35
27-1	1b	2.5	1	1	0	23.13	8	7.33	15.13
27-1	1b	5	1	1	0	29.86	10	8	19.86
27-1	1b	7.5	1	1	0	33.91	12	10	21.91
28-6	1a	2.5	1	1	0	46.62	13.33	8.67	33.29
28-6	1a	5	1	1	0	64.94	16.67	11.33	48.27
28-6	1a	7.5	1	1	0	72.54	19.33	12.67	53.21
15-4	1b	2.5	1	1	6.13	58.51	30	21.33	28.51
15-4	1b	5	1	1	6.32	86.53	50	30	36.53
15-4	1b	7.5	1	1	6.23	103.67	62.67	40	41
23-2	2a	2.5	1	1	18.37	53.02	32	28	21.02
23-2	2a	5	1	1	18.37	66.89	17.33	19.33	49.56
23-2	2a	7.5	1	1	18.37	78.16	20	17.33	58.16
23-5	1a	2.5	1	1	6.3	45	23.33	16.67	21.67
23-5	1a	5	1	1	6.3	69.29	44	24.67	25.29
23-5	1a	7.5	1	1	6.85	79.31	52	32	27.31
24-6	2b	2.5	1	1	18.27	60.03	36.67	30	23.36
24-6	2b	5	1	1	18.83	81.16	50.67	38	30.49
24-6	2b	7.5	1	1	18.62	94.94	56.67	42.67	38.27
27-4	1a	2.5	1	1	6	21.97	12	9.33	9.97
27-4	1a	5	1	1	5	31.89	16.67	12	15.22
27-4	1a	7.5	1	1	6.7	37.02	23.33	18	13.69
27-8	1a	2.5	1	1	11.47	48.63	20	16.67	28.63
27-8	1a	5	1	1	10.93	57.87	22	21.33	35.87
27-8	1a	7.5	1	1	11.47	65.48	38	32	27.48
27-2	1b	2.5	1	1	18.3	65.52	37.33	28.67	28.19
27-2	1b	5	1	1	17.53	84.41	52	37.33	32.41
27-2	1b	7.5	1	1	17.13	99.07	59.33	42	39.74
27-1	1c	2.5	1	1	10.67	49.35	20	17.33	29.35
27-1	1c	5	1	1	10.37	56.9	27.33	20	29.57
27-1	1c	7.5	1	1	9.7	59.42	34	24.67	25.42
28-6	1b	2.5	1	1	17.8	43.9	40.67	33.33	3.23
28-6	1b	5	1	1	16.43	58.65	58.67	52	-0.02
28-6	1b	7.5	1	1	14.13	71.13	65.33	54.67	5.8
28-6	2a	2.5	1	1	18.93	34.3	33.33	28	0.97
28-6	2a	5	1	1	18.73	45.89	52	40	-6.11
28-6	2a	7.5	1	1	18.23	49.33	52	41.33	-2.67
28-6	2b	2.5	1	1	6.2	48.2	19.33	16	28.87
28-6	2b	5	1	1	5.73	68.34	30.67	23.33	37.67
28-6	2b	7.5	1	1	4	77.78	40.67	30	37.11
32-1	1b	2.5	1	1	14.67	48.09	26	20	22.09
32-1	1b	5	1	1	14.43	59.97	32.67	22.67	27.3
32-1	1b	7.5	1	1	14	71.22	40.67	28.67	30.55
32-1	1c	2.5	1	1	10.2	45.2	27.33	23.33	17.87
32-1	1c	5	1	1	8.93	58.53	37.33	29.33	21.2
32-1	1c	7.5	1	1	7	81.36	44	34	37.36
32-2	1c	2.5	1	1	12.97	28.78	16.67	14.67	12.11
32-2	1c	5	1	1	10.37	39.26	18	15.33	21.26
32-2	1c	7.5	1	1	11.53	42.11	24	18	18.11
32-4	2c	2.5	1	1	5.3	20.81	10.67	10	10.14
32-4	2c	5	1	1	3.1	26.33	15.33	11.33	11
32-6	2a	2.5	1	1	0	9.2	8.67	8	0.53
32-6	2a	5	1	1	0	14.2	10.67	9.33	3.53
32-6	2a	7.5	1	1	0	16.16	13.33	11.33	2.83
32-7	2c	2.5	1	1	0.03	40.11	15.33	11.33	24.78
32-7	2c	5	1	1	0	60.31	26	18.67	34.31
32-7	2c	7.5	1	1	0	72.62	36.67	26	35.95
16-6	1a	2.5	4	1	0.1	38.94	22.67	19.33	16.27
16-6	1a	5	4	1	0	43.86	33.33	22	10.53
16-6	1a	7.5	4	1	0.03	50.42	34	25.33	16.42
15-2	1b	2.5	4	1	9.93	32.43	20	16.67	12.43
15-2	1b	5	4	1	10.57	45.42	26.67	20.67	18.75
15-2	1b	7.5	4	1	10.25	56.22	36	24	20.22
15-1	1b	2.5	4	1	11.87	23.55	15.33	15.33	8.22
15-1	1b	5	4	1	11.5	38.13	24	20.67	14.13
15-1	1b	7.5	4	1	10.9	55.87	32	27	23.87
16-8	1a	2.5	4	1	10.47	34.07	22	18.67	12.07
16-8	1a	5	4	1	9.8	39.12	28.67	22.67	10.45
16-8	1a	7.5	4	1	10.54	47.2	32.67	26.67	14.53
21-4	1a	2.5	4	1	12.13	32.01	18	18.67	14.01
21-4	1a	5	4	1	11.67	33.11	23.33	20.67	9.78
21-4	1a	7.5	4	1	11.8	38.02	24.67	24.67	13.35
21-6	2a	2.5	4	1	19.4	35.34	31	23	4.34
21-6	2a	5	4	1	19.05	42.02	41	25	1.02
21-6	2a	7.5	4	1	20.03	46.08	43.33	34.67	2.75
23-1	1a	2.5	4	1	19.67	96.25	60	42	36.25
23-1	1a	5	4	1	18.87	132.85	81.33	59.33	51.52
23-1	1a	7.5	4	1	19.53	159.61	114.67	88.67	44.94
23-4	1a	2.5	4	1	8.4	24.6	15.33	12	9.27
23-4	1a	5	4	1	9.1	31.95	19	14	12.95
23-4	1a	7.5	4	1	9	41.87	26	18	15.87
24-1	1a	2.5	4	1	12.73	26.25	16.67	14.67	9.58
24-1	1a	5	4	1	12.9	30.12	19.33	16	10.79
24-1	1a	7.5	4	1	13	33.56	22	19.33	11.56
24-3	1d	2.5	4	1	22.75	44.96	30	28	14.96
24-3	1d	5	4	1	24.8	58.99	40	33.33	18.99
24-3	1d	7.5	4	1	24.7	64.94	46.67	41.33	18.27
24-5	2a	2.5	4	1	6.83	38.77	19.33	16	19.44
24-5	2a	5	4	1	7.6	56.5	24.67	18.67	31.83
24-5	2a	7.5	4	1	7.73	84.75	31.33	22	53.42
24-7	1a	2.5	4	1	6.83	33.33	19.33	16	14
24-7	1a	5	4	1	6.9	34.25	24.67	18.67	9.58
24-7	1a	7.5	4	1	7.05	36.68	31.33	22	5.35
32-8	1b	2.5	4	1	0.03	28.8	15.33	11.33	13.47
32-8	1b	5	4	1	0	33.85	26	18.67	7.85
32-8	1b	7.5	4	1	0	36.1	36.67	26	-0.57
32-8	1c	2.5	4	1	0.23	35.88	13.33	10	22.55
32-8	1c	5	4	1	0.03	40.4	17.33	11.33	23.07
32-8	1c	7.5	4	1	0.23	43.87	21.33	12	22.54
32-8	2c	2.5	4	1	15.63	44.57	22	20.67	22.57
32-8	2c	5	4	1	16	64.32	31.33	24.67	32.99
32-10	1b	2.5	4	1	15.6	31.2	20	17.33	11.2
32-10	1b	5	4	1	14.87	54.63	24	20	30.63
32-10	1b	7.5	4	1	13.9	64.45	27.33	20	37.12
32-10	1c	2.5	4	1	11.2	21.83	14.67	14	7.16
32-10	1c	5	4	1	11.17	38.51	18.67	15.33	19.84
32-10	1c	7.5	4	1	10.77	55.51	23.33	17.33	32.18
32-10	2d	2.5	4	1	13.67	55.51	21.33	18	34.18
32-10	2d	5	4	1	13.53	83.49	30.67	24	52.82
32-10	2d	7.5	4	1	13	86.98	42.67	28.67	44.31

## Sheet: Spindle AfferentVibrations
Date	Animal#	Muscle#	Sex	Drug	Amplitude	Frequency	Entrain
2013-08-14	15-4	1	M	1	5	10	0
2013-08-14	15-4	1	M	1	5	25	0
2013-08-14	15-4	1	M	1	5	50	0
2013-08-14	15-4	1	M	1	5	100	0
2013-08-14	15-4	1	M	1	25	10	1
2013-08-14	15-4	1	M	1	25	25	0
2013-08-14	15-4	1	M	1	25	50	0
2013-08-14	15-4	1	M	1	25	100	0
2013-08-14	15-4	1	M	1	50	10	1
2013-08-14	15-4	1	M	1	50	25	1
2013-08-14	15-4	1	M	1	50	50	0
2013-08-14	15-4	1	M	1	50	100	0
2013-08-14	15-4	1	M	1	100	10	1
2013-08-14	15-4	1	M	1	100	25	1
2013-08-14	15-4	1	M	1	100	50	1
2013-08-14	15-4	1	M	1	100	100	1
2013-09-30	16-4	2	M	1	5	10	0
2013-09-30	16-4	2	M	1	5	25	0
2013-09-30	16-4	2	M	1	5	50	0
2013-09-30	16-4	2	M	1	5	100	0
2013-09-30	16-4	2	M	1	25	10	0
2013-09-30	16-4	2	M	1	25	25	0
2013-09-30	16-4	2	M	1	25	50	0
2013-09-30	16-4	2	M	1	25	100	0
2013-09-30	16-4	2	M	1	50	10	1
2013-09-30	16-4	2	M	1	50	25	0
2013-09-30	16-4	2	M	1	50	50	0
2013-09-30	16-4	2	M	1	50	100	0
2013-09-30	16-4	2	M	1	100	10	1
2013-09-30	16-4	2	M	1	100	25	1
2013-09-30	16-4	2	M	1	100	50	0
2013-09-30	16-4	2	M	1	100	100	0
2014-06-16	23-2	2	M	1	5	10	0
2014-06-16	23-2	2	M	1	5	25	0
2014-06-16	23-2	2	M	1	5	50	0
2014-06-16	23-2	2	M	1	5	100	0
2014-06-16	23-2	2	M	1	25	10	1
2014-06-16	23-2	2	M	1	25	25	1
2014-06-16	23-2	2	M	1	25	50	0
2014-06-16	23-2	2	M	1	25	100	0
2014-06-16	23-2	2	M	1	50	10	1
2014-06-16	23-2	2	M	1	50	25	1
2014-06-16	23-2	2	M	1	50	50	0
2014-06-16	23-2	2	M	1	50	100	0
2014-06-16	23-2	2	M	1	100	10	1
2014-06-16	23-2	2	M	1	100	25	1
2014-06-16	23-2	2	M	1	100	50	1
2014-06-16	23-2	2	M	1	100	100	1
2014-06-23	23-5	1	M	1	5	10	0
2014-06-23	23-5	1	M	1	5	25	0
2014-06-23	23-5	1	M	1	5	50	0
2014-06-23	23-5	1	M	1	5	100	0
2014-06-23	23-5	1	M	1	25	10	1
2014-06-23	23-5	1	M	1	25	25	0
2014-06-23	23-5	1	M	1	25	50	0
2014-06-23	23-5	1	M	1	25	100	0
2014-06-23	23-5	1	M	1	50	10	1
2014-06-23	23-5	1	M	1	50	25	0
2014-06-23	23-5	1	M	1	50	50	0
2014-06-23	23-5	1	M	1	50	100	0
2014-06-23	23-5	1	M	1	100	10	1
2014-06-23	23-5	1	M	1	100	25	1
2014-06-23	23-5	1	M	1	100	50	0
2014-06-23	23-5	1	M	1	100	100	0
2014-07-02	24-6	2	M	1	5	10	1
2014-07-02	24-6	2	M	1	5	25	0
2014-07-02	24-6	2	M	1	5	50	0
2014-07-02	24-6	2	M	1	5	100	0
2014-07-02	24-6	2	M	1	25	10	1
2014-07-02	24-6	2	M	1	25	25	1
2014-07-02	24-6	2	M	1	25	50	0
2014-07-02	24-6	2	M	1	25	100	0
2014-07-02	24-6	2	M	1	50	10	1
2014-07-02	24-6	2	M	1	50	25	1
2014-07-02	24-6	2	M	1	50	50	0
2014-07-02	24-6	2	M	1	50	100	0
2014-07-02	24-6	2	M	1	100	10	1
2014-07-02	24-6	2	M	1	100	25	1
2014-07-02	24-6	2	M	1	100	50	1
2014-07-02	24-6	2	M	1	100	100	1
2014-09-19	27-4	1	M	1	5	10	0
2014-09-19	27-4	1	M	1	5	25	0
2014-09-19	27-4	1	M	1	5	50	0
2014-09-19	27-4	1	M	1	5	100	0
2014-09-19	27-4	1	M	1	25	10	0
2014-09-19	27-4	1	M	1	25	25	0
2014-09-19	27-4	1	M	1	25	50	0
2014-09-19	27-4	1	M	1	25	100	0
2014-09-19	27-4	1	M	1	50	10	1
2014-09-19	27-4	1	M	1	50	25	0
2014-09-19	27-4	1	M	1	50	50	0
2014-09-19	27-4	1	M	1	50	100	0
2014-09-19	27-4	1	M	1	100	10	1
2014-09-19	27-4	1	M	1	100	25	1
2014-09-19	27-4	1	M	1	100	50	0
2014-09-19	27-4	1	M	1	100	100	0
2014-10-03	27-8	1	M	1	5	10	0
2014-10-03	27-8	1	M	1	5	25	0
2014-10-03	27-8	1	M	1	5	50	0
2014-10-03	27-8	1	M	1	5	100	0
2014-10-03	27-8	1	M	1	25	10	1
2014-10-03	27-8	1	M	1	25	25	1
2014-10-03	27-8	1	M	1	25	50	1
2014-10-03	27-8	1	M	1	25	100	1
2014-10-03	27-8	1	M	1	50	10	1
2014-10-03	27-8	1	M	1	50	25	1
2014-10-03	27-8	1	M	1	50	50	1
2014-10-03	27-8	1	M	1	50	100	1
2014-10-03	27-8	1	M	1	100	10	1
2014-10-03	27-8	1	M	1	100	25	1
2014-10-03	27-8	1	M	1	100	50	1
2014-10-03	27-8	1	M	1	100	100	1
2014-10-03	27-8	1	M	1	5	10	0
2014-10-03	27-8	1	M	1	5	25	0
2014-10-03	27-8	1	M	1	5	50	0
2014-10-03	27-8	1	M	1	5	100	0
2014-10-03	27-8	1	M	1	25	10	1
2014-10-03	27-8	1	M	1	25	25	1
2014-10-03	27-8	1	M	1	25	50	1
2014-10-03	27-8	1	M	1	25	100	0
2014-10-03	27-8	1	M	1	50	10	1
2014-10-03	27-8	1	M	1	50	25	1
2014-10-03	27-8	1	M	1	50	50	1
2014-10-03	27-8	1	M	1	50	100	1
2014-10-03	27-8	1	M	1	100	10	1
2014-10-03	27-8	1	M	1	100	25	1
2014-10-03	27-8	1	M	1	100	50	1
2014-10-03	27-8	1	M	1	100	100	1
2014-10-10	28-2	1	M	1	5	10	0
2014-10-10	28-2	1	M	1	5	25	0
2014-10-10	28-2	1	M	1	5	50	0
2014-10-10	28-2	1	M	1	5	100	0
2014-10-10	28-2	1	M	1	25	10	1
2014-10-10	28-2	1	M	1	25	25	1
2014-10-10	28-2	1	M	1	25	50	0
2014-10-10	28-2	1	M	1	25	100	0
2014-10-10	28-2	1	M	1	50	10	1
2014-10-10	28-2	1	M	1	50	25	1
2014-10-10	28-2	1	M	1	50	50	1
2014-10-10	28-2	1	M	1	50	100	0
2014-10-10	28-2	1	M	1	100	10	1
2014-10-10	28-2	1	M	1	100	25	1
2014-10-10	28-2	1	M	1	100	50	1
2014-10-10	28-2	1	M	1	100	100	1
2014-10-17	28-4	2	M	1	5	10	0
2014-10-17	28-4	2	M	1	5	25	0
2014-10-17	28-4	2	M	1	5	50	0
2014-10-17	28-4	2	M	1	5	100	0
2014-10-17	28-4	2	M	1	25	10	1
2014-10-17	28-4	2	M	1	25	25	1
2014-10-17	28-4	2	M	1	25	50	1
2014-10-17	28-4	2	M	1	25	100	1
2014-10-17	28-4	2	M	1	50	10	1
2014-10-17	28-4	2	M	1	50	25	1
2014-10-17	28-4	2	M	1	50	50	1
2014-10-17	28-4	2	M	1	50	100	1
2014-10-17	28-4	2	M	1	100	10	1
2014-10-17	28-4	2	M	1	100	25	1
2014-10-17	28-4	2	M	1	100	50	1
2014-10-17	28-4	2	M	1	100	100	1
2014-10-23	28-5	1	M	1	5	10	1
2014-10-23	28-5	1	M	1	5	25	0
2014-10-23	28-5	1	M	1	5	50	0
2014-10-23	28-5	1	M	1	5	100	0
2014-10-23	28-5	1	M	1	25	10	1
2014-10-23	28-5	1	M	1	25	25	0
2014-10-23	28-5	1	M	1	25	50	0
2014-10-23	28-5	1	M	1	25	100	0
2014-10-23	28-5	1	M	1	50	10	1
2014-10-23	28-5	1	M	1	50	25	1
2014-10-23	28-5	1	M	1	50	50	1
2014-10-23	28-5	1	M	1	50	100	1
2014-10-23	28-5	1	M	1	100	10	1
2014-10-23	28-5	1	M	1	100	25	1
2014-10-23	28-5	1	M	1	100	50	1
2014-10-23	28-5	1	M	1	100	100	1
2014-10-24	28-6	1	M	1	5	10	0
2014-10-24	28-6	1	M	1	5	25	0
2014-10-24	28-6	1	M	1	5	50	0
2014-10-24	28-6	1	M	1	5	100	0
2014-10-24	28-6	1	M	1	25	10	1
2014-10-24	28-6	1	M	1	25	25	0
2014-10-24	28-6	1	M	1	25	50	0
2014-10-24	28-6	1	M	1	25	100	0
2014-10-24	28-6	1	M	1	50	10	1
2014-10-24	28-6	1	M	1	50	25	0
2014-10-24	28-6	1	M	1	50	50	0
2014-10-24	28-6	1	M	1	50	100	0
2014-10-24	28-6	1	M	1	100	10	1
2014-10-24	28-6	1	M	1	100	25	1
2014-10-24	28-6	1	M	1	100	50	0
2014-10-24	28-6	1	M	1	100	100	0
2014-10-24	28-6	2	M	1	5	10	0
2014-10-24	28-6	2	M	1	5	25	0
2014-10-24	28-6	2	M	1	5	50	0
2014-10-24	28-6	2	M	1	5	100	0
2014-10-24	28-6	2	M	1	25	10	1
2014-10-24	28-6	2	M	1	25	25	1
2014-10-24	28-6	2	M	1	25	50	0
2014-10-24	28-6	2	M	1	25	100	0
2014-10-24	28-6	2	M	1	50	10	1
2014-10-24	28-6	2	M	1	50	25	1
2014-10-24	28-6	2	M	1	50	50	1
2014-10-24	28-6	2	M	1	50	100	1
2014-10-24	28-6	2	M	1	100	10	1
2014-10-24	28-6	2	M	1	100	25	1
2014-10-24	28-6	2	M	1	100	50	1
2014-10-24	28-6	2	M	1	100	100	1
2016-02-05	32-1	1	M	1	5	10	0
2016-02-05	32-1	1	M	1	5	25	0
2016-02-05	32-1	1	M	1	5	50	0
2016-02-05	32-1	1	M	1	5	100	0
2016-02-05	32-1	1	M	1	25	10	1
2016-02-05	32-1	1	M	1	25	25	0
2016-02-05	32-1	1	M	1	25	50	0
2016-02-05	32-1	1	M	1	25	100	0
2016-02-05	32-1	1	M	1	50	10	1
2016-02-05	32-1	1	M	1	50	25	0
2016-02-05	32-1	1	M	1	50	50	0
2016-02-05	32-1	1	M	1	50	100	0
2016-02-05	32-1	1	M	1	100	10	1
2016-02-05	32-1	1	M	1	100	25	1
2016-02-05	32-1	1	M	1	100	50	0
2016-02-05	32-1	1	M	1	100	100	0
2016-02-05	32-1	1	M	1	5	10	0
2016-02-05	32-1	1	M	1	5	25	0
2016-02-05	32-1	1	M	1	5	50	0
2016-02-05	32-1	1	M	1	5	100	0
2016-02-05	32-1	1	M	1	25	10	1
2016-02-05	32-1	1	M	1	25	25	1
2016-02-05	32-1	1	M	1	25	50	0
2016-02-05	32-1	1	M	1	25	100	0
2016-02-05	32-1	1	M	1	50	10	1
2016-02-05	32-1	1	M	1	50	25	1
2016-02-05	32-1	1	M	1	50	50	0
2016-02-05	32-1	1	M	1	50	100	0
2016-02-05	32-1	1	M	1	100	10	1
2016-02-05	32-1	1	M	1	100	25	1
2016-02-05	32-1	1	M	1	100	50	1
2016-02-05	32-1	1	M	1	100	100	0
2016-02-10	32-2	1	M	1	5	10	1
2016-02-10	32-2	1	M	1	5	25	0
2016-02-10	32-2	1	M	1	5	50	0
2016-02-10	32-2	1	M	1	5	100	0
2016-02-10	32-2	1	M	1	25	10	1
2016-02-10	32-2	1	M	1	25	25	1
2016-02-10	32-2	1	M	1	25	50	0
2016-02-10	32-2	1	M	1	25	100	0
2016-02-10	32-2	1	M	1	50	10	1
2016-02-10	32-2	1	M	1	50	25	1
2016-02-10	32-2	1	M	1	50	50	1
2016-02-10	32-2	1	M	1	50	100	1
2016-02-10	32-2	1	M	1	100	10	1
2016-02-10	32-2	1	M	1	100	25	1
2016-02-10	32-2	1	M	1	100	50	1
2016-02-10	32-2	1	M	1	100	100	1
2016-02-17	32-4	2	M	1	5	10	0
2016-02-17	32-4	2	M	1	5	25	0
2016-02-17	32-4	2	M	1	5	50	0
2016-02-17	32-4	2	M	1	5	100	0
2016-02-17	32-4	2	M	1	25	10	1
2016-02-17	32-4	2	M	1	25	25	0
2016-02-17	32-4	2	M	1	25	50	0
2016-02-17	32-4	2	M	1	25	100	0
2016-02-17	32-4	2	M	1	50	10	1
2016-02-17	32-4	2	M	1	50	25	0
2016-02-17	32-4	2	M	1	50	50	0
2016-02-17	32-4	2	M	1	50	100	0
2016-02-17	32-4	2	M	1	100	10	1
2016-02-17	32-4	2	M	1	100	25	1
2016-02-17	32-4	2	M	1	100	50	0
2016-02-17	32-4	2	M	1	100	100	0
2016-02-17	32-4	2	M	1	5	10	1
2016-02-17	32-4	2	M	1	5	25	0
2016-02-17	32-4	2	M	1	5	50	0
2016-02-17	32-4	2	M	1	5	100	0
2016-02-17	32-4	2	M	1	25	10	1
2016-02-17	32-4	2	M	1	25	25	1
2016-02-17	32-4	2	M	1	25	50	1
2016-02-17	32-4	2	M	1	25	100	1
2016-02-17	32-4	2	M	1	50	10	1
2016-02-17	32-4	2	M	1	50	25	1
2016-02-17	32-4	2	M	1	50	50	1
2016-02-17	32-4	2	M	1	50	100	1
2016-02-17	32-4	2	M	1	100	10	1
2016-02-17	32-4	2	M	1	100	25	1
2016-02-17	32-4	2	M	1	100	50	1
2016-02-17	32-4	2	M	1	100	100	1
2016-02-17	32-4	2	M	1	5	10	0
2016-02-17	32-4	2	M	1	5	25	0
2016-02-17	32-4	2	M	1	5	50	0
2016-02-17	32-4	2	M	1	5	100	0
2016-02-17	32-4	2	M	1	25	10	1
2016-02-17	32-4	2	M	1	25	25	0
2016-02-17	32-4	2	M	1	25	50	0
2016-02-17	32-4	2	M	1	25	100	0
2016-02-17	32-4	2	M	1	50	10	1
2016-02-17	32-4	2	M	1	50	25	1
2016-02-17	32-4	2	M	1	50	50	1
2016-02-17	32-4	2	M	1	50	100	1
2016-02-17	32-4	2	M	1	100	10	1
2016-02-17	32-4	2	M	1	100	25	1
2016-02-17	32-4	2	M	1	100	50	1
2016-02-17	32-4	2	M	1	100	100	1
2016-02-24	32-6	2	M	1	5	10	0
2016-02-24	32-6	2	M	1	5	25	0
2016-02-24	32-6	2	M	1	5	50	0
2016-02-24	32-6	2	M	1	5	100	0
2016-02-24	32-6	2	M	1	25	10	0
2016-02-24	32-6	2	M	1	25	25	0
2016-02-24	32-6	2	M	1	25	50	0
2016-02-24	32-6	2	M	1	25	100	0
2016-02-24	32-6	2	M	1	50	10	0
2016-02-24	32-6	2	M	1	50	25	0
2016-02-24	32-6	2	M	1	50	50	0
2016-02-24	32-6	2	M	1	50	100	0
2016-02-24	32-6	2	M	1	100	10	1
2016-02-24	32-6	2	M	1	100	25	0
2016-02-24	32-6	2	M	1	100	50	0
2016-02-24	32-6	2	M	1	100	100	0
2016-02-24	32-6	2	M	1	5	10	0
2016-02-24	32-6	2	M	1	5	25	0
2016-02-24	32-6	2	M	1	5	50	0
2016-02-24	32-6	2	M	1	5	100	0
2016-02-24	32-6	2	M	1	25	10	0
2016-02-24	32-6	2	M	1	25	25	0
2016-02-24	32-6	2	M	1	25	50	0
2016-02-24	32-6	2	M	1	25	100	0
2016-02-24	32-6	2	M	1	50	10	0
2016-02-24	32-6	2	M	1	50	25	0
2016-02-24	32-6	2	M	1	50	50	0
2016-02-24	32-6	2	M	1	50	100	0
2016-02-24	32-6	2	M	1	100	10	0
2016-02-24	32-6	2	M	1	100	25	0
2016-02-24	32-6	2	M	1	100	50	0
2016-02-24	32-6	2	M	1	100	100	0
2016-02-26	32-7	2	M	1	5	10	0
2016-02-26	32-7	2	M	1	5	25	0
2016-02-26	32-7	2	M	1	5	50	0
2016-02-26	32-7	2	M	1	5	100	0
2016-02-26	32-7	2	M	1	25	10	1
2016-02-26	32-7	2	M	1	25	25	0
2016-02-26	32-7	2	M	1	25	50	0
2016-02-26	32-7	2	M	1	25	100	0
2016-02-26	32-7	2	M	1	50	10	1
2016-02-26	32-7	2	M	1	50	25	0
2016-02-26	32-7	2	M	1	50	50	0
2016-02-26	32-7	2	M	1	50	100	0
2016-02-26	32-7	2	M	1	100	10	1
2016-02-26	32-7	2	M	1	100	25	1
2016-02-26	32-7	2	M	1	100	50	0
2016-02-26	32-7	2	M	1	100	100	0
2016-02-26	32-7	2	M	1	5	10	0
2016-02-26	32-7	2	M	1	5	25	0
2016-02-26	32-7	2	M	1	5	50	0
2016-02-26	32-7	2	M	1	5	100	0
2016-02-26	32-7	2	M	1	25	10	1
2016-02-26	32-7	2	M	1	25	25	1
2016-02-26	32-7	2	M	1	25	50	0
2016-02-26	32-7	2	M	1	25	100	0
2016-02-26	32-7	2	M	1	50	10	1
2016-02-26	32-7	2	M	1	50	25	1
2016-02-26	32-7	2	M	1	50	50	1
2016-02-26	32-7	2	M	1	50	100	1
2016-02-26	32-7	2	M	1	100	10	1
2016-02-26	32-7	2	M	1	100	25	1
2016-02-26	32-7	2	M	1	100	50	1
2016-02-26	32-7	2	M	1	100	100	1
2013-08-26	15-2	1	M	4	5	10	0
2013-08-26	15-2	1	M	4	5	25	0
2013-08-26	15-2	1	M	4	5	50	0
2013-08-26	15-2	1	M	4	5	100	0
2013-08-26	15-2	1	M	4	25	10	1
2013-08-26	15-2	1	M	4	25	25	0
2013-08-26	15-2	1	M	4	25	50	0
2013-08-26	15-2	1	M	4	25	100	0
2013-08-26	15-2	1	M	4	50	10	1
2013-08-26	15-2	1	M	4	50	25	0
2013-08-26	15-2	1	M	4	50	50	0
2013-08-26	15-2	1	M	4	50	100	0
2013-08-26	15-2	1	M	4	100	10	1
2013-08-26	15-2	1	M	4	100	25	0
2013-08-26	15-2	1	M	4	100	50	0
2013-08-26	15-2	1	M	4	100	100	0
2013-09-20	15-1	1	M	4	5	10	0
2013-09-20	15-1	1	M	4	5	25	0
2013-09-20	15-1	1	M	4	5	50	0
2013-09-20	15-1	1	M	4	5	100	0
2013-09-20	15-1	1	M	4	25	10	0
2013-09-20	15-1	1	M	4	25	25	0
2013-09-20	15-1	1	M	4	25	50	0
2013-09-20	15-1	1	M	4	25	100	0
2013-09-20	15-1	1	M	4	50	10	1
2013-09-20	15-1	1	M	4	50	25	0
2013-09-20	15-1	1	M	4	50	50	0
2013-09-20	15-1	1	M	4	50	100	0
2013-09-20	15-1	1	M	4	100	10	1
2013-09-20	15-1	1	M	4	100	25	1
2013-09-20	15-1	1	M	4	100	50	0
2013-09-20	15-1	1	M	4	100	100	0
2013-09-27	16-6	1	M	4	5	10	0
2013-09-27	16-6	1	M	4	5	25	0
2013-09-27	16-6	1	M	4	5	50	0
2013-09-27	16-6	1	M	4	5	100	0
2013-09-27	16-6	1	M	4	25	10	0
2013-09-27	16-6	1	M	4	25	25	0
2013-09-27	16-6	1	M	4	25	50	0
2013-09-27	16-6	1	M	4	25	100	0
2013-09-27	16-6	1	M	4	50	10	1
2013-09-27	16-6	1	M	4	50	25	0
2013-09-27	16-6	1	M	4	50	50	0
2013-09-27	16-6	1	M	4	50	100	0
2013-09-27	16-6	1	M	4	100	10	1
2013-09-27	16-6	1	M	4	100	25	1
2013-09-27	16-6	1	M	4	100	50	0
2013-09-27	16-6	1	M	4	100	100	0
2014-02-21	21-4	1	M	4	5	10	0
2014-02-21	21-4	1	M	4	5	25	0
2014-02-21	21-4	1	M	4	5	50	0
2014-02-21	21-4	1	M	4	5	100	0
2014-02-21	21-4	1	M	4	25	10	1
2014-02-21	21-4	1	M	4	25	25	0
2014-02-21	21-4	1	M	4	25	50	0
2014-02-21	21-4	1	M	4	25	100	0
2014-02-21	21-4	1	M	4	50	10	1
2014-02-21	21-4	1	M	4	50	25	1
2014-02-21	21-4	1	M	4	50	50	0
2014-02-21	21-4	1	M	4	50	100	0
2014-02-21	21-4	1	M	4	100	10	1
2014-02-21	21-4	1	M	4	100	25	1
2014-02-21	21-4	1	M	4	100	50	1
2014-02-21	21-4	1	M	4	100	100	0
2014-02-28	21-6	1	M	4	5	10	0
2014-02-28	21-6	1	M	4	5	25	0
2014-02-28	21-6	1	M	4	5	50	0
2014-02-28	21-6	1	M	4	5	100	0
2014-02-28	21-6	1	M	4	25	10	1
2014-02-28	21-6	1	M	4	25	25	0
2014-02-28	21-6	1	M	4	25	50	0
2014-02-28	21-6	1	M	4	25	100	0
2014-02-28	21-6	1	M	4	50	10	1
2014-02-28	21-6	1	M	4	50	25	0
2014-02-28	21-6	1	M	4	50	50	0
2014-02-28	21-6	1	M	4	50	100	0
2014-02-28	21-6	1	M	4	100	10	1
2014-02-28	21-6	1	M	4	100	25	1
2014-02-28	21-6	1	M	4	100	50	1
2014-02-28	21-6	1	M	4	100	100	0
2014-02-28	21-6	2	M	4	5	10	0
2014-02-28	21-6	2	M	4	5	25	0
2014-02-28	21-6	2	M	4	5	50	0
2014-02-28	21-6	2	M	4	5	100	0
2014-02-28	21-6	2	M	4	25	10	0
2014-02-28	21-6	2	M	4	25	25	0
2014-02-28	21-6	2	M	4	25	50	0
2014-02-28	21-6	2	M	4	25	100	0
2014-02-28	21-6	2	M	4	50	10	1
2014-02-28	21-6	2	M	4	50	25	0
2014-02-28	21-6	2	M	4	50	50	0
2014-02-28	21-6	2	M	4	50	100	0
2014-02-28	21-6	2	M	4	100	10	1
2014-02-28	21-6	2	M	4	100	25	1
2014-02-28	21-6	2	M	4	100	50	0
2014-02-28	21-6	2	M	4	100	100	0
2014-06-17	23-1	1	M	4	5	10	0
2014-06-17	23-1	1	M	4	5	25	0
2014-06-17	23-1	1	M	4	5	50	0
2014-06-17	23-1	1	M	4	5	100	0
2014-06-17	23-1	1	M	4	25	10	1
2014-06-17	23-1	1	M	4	25	25	1
2014-06-17	23-1	1	M	4	25	50	0
2014-06-17	23-1	1	M	4	25	100	0
2014-06-17	23-1	1	M	4	50	10	1
2014-06-17	23-1	1	M	4	50	25	1
2014-06-17	23-1	1	M	4	50	50	0
2014-06-17	23-1	1	M	4	50	100	0
2014-06-17	23-1	1	M	4	100	10	1
2014-06-17	23-1	1	M	4	100	25	1
2014-06-17	23-1	1	M	4	100	50	1
2014-06-17	23-1	1	M	4	100	100	1
2014-06-19	23-4	1	M	4	5	10	0
2014-06-19	23-4	1	M	4	5	25	0
2014-06-19	23-4	1	M	4	5	50	0
2014-06-19	23-4	1	M	4	5	100	0
2014-06-19	23-4	1	M	4	25	10	1
2014-06-19	23-4	1	M	4	25	25	1
2014-06-19	23-4	1	M	4	25	50	0
2014-06-19	23-4	1	M	4	25	100	0
2014-06-19	23-4	1	M	4	50	10	1
2014-06-19	23-4	1	M	4	50	25	1
2014-06-19	23-4	1	M	4	50	50	1
2014-06-19	23-4	1	M	4	50	100	0
2014-06-19	23-4	1	M	4	100	10	1
2014-06-19	23-4	1	M	4	100	25	1
2014-06-19	23-4	1	M	4	100	50	1
2014-06-19	23-4	1	M	4	100	100	1
2014-06-24	24-1	1	M	4	5	10	0
2014-06-24	24-1	1	M	4	5	25	0
2014-06-24	24-1	1	M	4	5	50	0
2014-06-24	24-1	1	M	4	5	100	0
2014-06-24	24-1	1	M	4	25	10	1
2014-06-24	24-1	1	M	4	25	25	0
2014-06-24	24-1	1	M	4	25	50	0
2014-06-24	24-1	1	M	4	25	100	0
2014-06-24	24-1	1	M	4	50	10	1
2014-06-24	24-1	1	M	4	50	25	1
2014-06-24	24-1	1	M	4	50	50	0
2014-06-24	24-1	1	M	4	50	100	0
2014-06-24	24-1	1	M	4	100	10	1
2014-06-24	24-1	1	M	4	100	25	1
2014-06-24	24-1	1	M	4	100	50	1
2014-06-24	24-1	1	M	4	100	100	0
2014-06-26	24-3	1	M	4	5	10	1
2014-06-26	24-3	1	M	4	5	25	1
2014-06-26	24-3	1	M	4	5	50	0
2014-06-26	24-3	1	M	4	5	100	0
2014-06-26	24-3	1	M	4	25	10	1
2014-06-26	24-3	1	M	4	25	25	1
2014-06-26	24-3	1	M	4	25	50	1
2014-06-26	24-3	1	M	4	25	100	0
2014-06-26	24-3	1	M	4	50	10	1
2014-06-26	24-3	1	M	4	50	25	1
2014-06-26	24-3	1	M	4	50	50	1
2014-06-26	24-3	1	M	4	50	100	1
2014-06-26	24-3	1	M	4	100	10	1
2014-06-26	24-3	1	M	4	100	25	1
2014-06-26	24-3	1	M	4	100	50	1
2014-06-26	24-3	1	M	4	100	100	1
2014-07-01	24-5	2	M	4	5	10	0
2014-07-01	24-5	2	M	4	5	25	0
2014-07-01	24-5	2	M	4	5	50	0
2014-07-01	24-5	2	M	4	5	100	0
2014-07-01	24-5	2	M	4	25	10	0
2014-07-01	24-5	2	M	4	25	25	0
2014-07-01	24-5	2	M	4	25	50	0
2014-07-01	24-5	2	M	4	25	100	0
2014-07-01	24-5	2	M	4	50	10	0
2014-07-01	24-5	2	M	4	50	25	0
2014-07-01	24-5	2	M	4	50	50	0
2014-07-01	24-5	2	M	4	50	100	0
2014-07-01	24-5	2	M	4	100	10	1
2014-07-01	24-5	2	M	4	100	25	1
2014-07-01	24-5	2	M	4	100	50	1
2014-07-01	24-5	2	M	4	100	100	1
2014-07-03	24-7	1	M	4	5	10	1
2014-07-03	24-7	1	M	4	5	25	0
2014-07-03	24-7	1	M	4	5	50	0
2014-07-03	24-7	1	M	4	5	100	0
2014-07-03	24-7	1	M	4	25	10	1
2014-07-03	24-7	1	M	4	25	25	0
2014-07-03	24-7	1	M	4	25	50	0
2014-07-03	24-7	1	M	4	25	100	0
2014-07-03	24-7	1	M	4	50	10	1
2014-07-03	24-7	1	M	4	50	25	0
2014-07-03	24-7	1	M	4	50	50	0
2014-07-03	24-7	1	M	4	50	100	0
2014-07-03	24-7	1	M	4	100	10	1
2014-07-03	24-7	1	M	4	100	25	1
2014-07-03	24-7	1	M	4	100	50	0
2014-07-03	24-7	1	M	4	100	100	0
2016-03-02	32-8	1	M	4	5	10	0
2016-03-02	32-8	1	M	4	5	25	0
2016-03-02	32-8	1	M	4	5	50	0
2016-03-02	32-8	1	M	4	5	100	0
2016-03-02	32-8	1	M	4	25	10	1
2016-03-02	32-8	1	M	4	25	25	0
2016-03-02	32-8	1	M	4	25	50	0
2016-03-02	32-8	1	M	4	25	100	0
2016-03-02	32-8	1	M	4	50	10	1
2016-03-02	32-8	1	M	4	50	25	0
2016-03-02	32-8	1	M	4	50	50	0
2016-03-02	32-8	1	M	4	50	100	0
2016-03-02	32-8	1	M	4	100	10	1
2016-03-02	32-8	1	M	4	100	25	0
2016-03-02	32-8	1	M	4	100	50	0
2016-03-02	32-8	1	M	4	100	100	0
2016-03-02	32-8	1	M	4	5	10	0
2016-03-02	32-8	1	M	4	5	25	0
2016-03-02	32-8	1	M	4	5	50	0
2016-03-02	32-8	1	M	4	5	100	0
2016-03-02	32-8	1	M	4	25	10	1
2016-03-02	32-8	1	M	4	25	25	0
2016-03-02	32-8	1	M	4	25	50	0
2016-03-02	32-8	1	M	4	25	100	0
2016-03-02	32-8	1	M	4	50	10	1
2016-03-02	32-8	1	M	4	50	25	1
2016-03-02	32-8	1	M	4	50	50	0
2016-03-02	32-8	1	M	4	50	100	0
2016-03-02	32-8	1	M	4	100	10	1
2016-03-02	32-8	1	M	4	100	25	1
2016-03-02	32-8	1	M	4	100	50	1
2016-03-02	32-8	1	M	4	100	100	0
2016-03-02	32-8	1	M	4	5	10	0
2016-03-02	32-8	1	M	4	5	25	0
2016-03-02	32-8	1	M	4	5	50	0
2016-03-02	32-8	1	M	4	5	100	0
2016-03-02	32-8	1	M	4	25	10	0
2016-03-02	32-8	1	M	4	25	25	0
2016-03-02	32-8	1	M	4	25	50	0
2016-03-02	32-8	1	M	4	25	100	0
2016-03-02	32-8	1	M	4	50	10	1
2016-03-02	32-8	1	M	4	50	25	0
2016-03-02	32-8	1	M	4	50	50	0
2016-03-02	32-8	1	M	4	50	100	0
2016-03-02	32-8	1	M	4	100	10	1
2016-03-02	32-8	1	M	4	100	25	1
2016-03-02	32-8	1	M	4	100	50	1
2016-03-02	32-8	1	M	4	100	100	1
2016-03-02	32-8	2	M	4	5	10	0
2016-03-02	32-8	2	M	4	5	25	0
2016-03-02	32-8	2	M	4	5	50	0
2016-03-02	32-8	2	M	4	5	100	0
2016-03-02	32-8	2	M	4	25	10	0
2016-03-02	32-8	2	M	4	25	25	0
2016-03-02	32-8	2	M	4	25	50	0
2016-03-02	32-8	2	M	4	25	100	0
2016-03-02	32-8	2	M	4	50	10	1
2016-03-02	32-8	2	M	4	50	25	1
2016-03-02	32-8	2	M	4	50	50	0
2016-03-02	32-8	2	M	4	50	100	0
2016-03-02	32-8	2	M	4	100	10	1
2016-03-02	32-8	2	M	4	100	25	1
2016-03-02	32-8	2	M	4	100	50	1
2016-03-02	32-8	2	M	4	100	100	0
2016-03-09	32-10	1	M	4	5	10	0
2016-03-09	32-10	1	M	4	5	25	0
2016-03-09	32-10	1	M	4	5	50	0
2016-03-09	32-10	1	M	4	5	100	0
2016-03-09	32-10	1	M	4	25	10	1
2016-03-09	32-10	1	M	4	25	25	1
2016-03-09	32-10	1	M	4	25	50	1
2016-03-09	32-10	1	M	4	25	100	0
2016-03-09	32-10	1	M	4	50	10	1
2016-03-09	32-10	1	M	4	50	25	1
2016-03-09	32-10	1	M	4	50	50	1
2016-03-09	32-10	1	M	4	50	100	1
2016-03-09	32-10	1	M	4	100	10	1
2016-03-09	32-10	1	M	4	100	25	1
2016-03-09	32-10	1	M	4	100	50	1
2016-03-09	32-10	1	M	4	100	100	1
2016-03-09	32-10	1	M	4	5	10	1
2016-03-09	32-10	1	M	4	5	25	0
2016-03-09	32-10	1	M	4	5	50	0
2016-03-09	32-10	1	M	4	5	100	0
2016-03-09	32-10	1	M	4	25	10	1
2016-03-09	32-10	1	M	4	25	25	1
2016-03-09	32-10	1	M	4	25	50	0
2016-03-09	32-10	1	M	4	25	100	0
2016-03-09	32-10	1	M	4	50	10	1
2016-03-09	32-10	1	M	4	50	25	1
2016-03-09	32-10	1	M	4	50	50	1
2016-03-09	32-10	1	M	4	50	100	1
2016-03-09	32-10	1	M	4	100	10	1
2016-03-09	32-10	1	M	4	100	25	1
2016-03-09	32-10	1	M	4	100	50	1
2016-03-09	32-10	1	M	4	100	100	1
2014-07-10	25-2	1	F	1	5	10	0
2014-07-10	25-2	1	F	1	5	25	0
2014-07-10	25-2	1	F	1	5	50	0
2014-07-10	25-2	1	F	1	5	100	0
2014-07-10	25-2	1	F	1	25	10	1
2014-07-10	25-2	1	F	1	25	25	1
2014-07-10	25-2	1	F	1	25	50	0
2014-07-10	25-2	1	F	1	25	100	0
2014-07-10	25-2	1	F	1	50	10	1
2014-07-10	25-2	1	F	1	50	25	1
2014-07-10	25-2	1	F	1	50	50	1
2014-07-10	25-2	1	F	1	50	100	1
2014-07-10	25-2	1	F	1	100	10	1
2014-07-10	25-2	1	F	1	100	25	1
2014-07-10	25-2	1	F	1	100	50	1
2014-07-10	25-2	1	F	1	100	100	1
2014-07-23	26-3	2	F	1	5	10	1
2014-07-23	26-3	2	F	1	5	25	0
2014-07-23	26-3	2	F	1	5	50	0
2014-07-23	26-3	2	F	1	5	100	0
2014-07-23	26-3	2	F	1	25	10	1
2014-07-23	26-3	2	F	1	25	25	0
2014-07-23	26-3	2	F	1	25	50	0
2014-07-23	26-3	2	F	1	25	100	0
2014-07-23	26-3	2	F	1	50	10	1
2014-07-23	26-3	2	F	1	50	25	1
2014-07-23	26-3	2	F	1	50	50	0
2014-07-23	26-3	2	F	1	50	100	0
2014-07-23	26-3	2	F	1	100	10	1
2014-07-23	26-3	2	F	1	100	25	1
2014-07-23	26-3	2	F	1	100	50	1
2014-07-23	26-3	2	F	1	100	100	1
2015-02-06	29-3	1	F	1	5	10	0
2015-02-06	29-3	1	F	1	5	25	0
2015-02-06	29-3	1	F	1	5	50	0
2015-02-06	29-3	1	F	1	5	100	0
2015-02-06	29-3	1	F	1	25	10	0
2015-02-06	29-3	1	F	1	25	25	0
2015-02-06	29-3	1	F	1	25	50	0
2015-02-06	29-3	1	F	1	25	100	0
2015-02-06	29-3	1	F	1	50	10	1
2015-02-06	29-3	1	F	1	50	25	0
2015-02-06	29-3	1	F	1	50	50	0
2015-02-06	29-3	1	F	1	50	100	0
2015-02-06	29-3	1	F	1	100	10	1
2015-02-06	29-3	1	F	1	100	25	0
2015-02-06	29-3	1	F	1	100	50	0
2015-02-06	29-3	1	F	1	100	100	0
2015-03-11	30-3	1	F	1	5	10	0
2015-03-11	30-3	1	F	1	5	25	0
2015-03-11	30-3	1	F	1	5	50	0
2015-03-11	30-3	1	F	1	5	100	0
2015-03-11	30-3	1	F	1	25	10	0
2015-03-11	30-3	1	F	1	25	25	0
2015-03-11	30-3	1	F	1	25	50	0
2015-03-11	30-3	1	F	1	25	100	0	]
2015-03-11	30-3	1	F	1	50	10	1
2015-03-11	30-3	1	F	1	50	25	1
2015-03-11	30-3	1	F	1	50	50	0
2015-03-11	30-3	1	F	1	50	100	0
2015-03-11	30-3	1	F	1	100	10	1
2015-03-11	30-3	1	F	1	100	25	1
2015-03-11	30-3	1	F	1	100	50	0
2015-03-11	30-3	1	F	1	100	100	0
2013-07-16	10-3	2	F	1	5	10	0
2013-07-16	10-3	2	F	1	5	25	0
2013-07-16	10-3	2	F	1	5	50	0
2013-07-16	10-3	2	F	1	5	100	0
2013-07-16	10-3	2	F	1	25	10	0
2013-07-16	10-3	2	F	1	25	25	0
2013-07-16	10-3	2	F	1	25	50	0
2013-07-16	10-3	2	F	1	25	100	0
2013-07-16	10-3	2	F	1	50	10	1
2013-07-16	10-3	2	F	1	50	25	1
2013-07-16	10-3	2	F	1	50	50	0
2013-07-16	10-3	2	F	1	50	100	0
2013-07-16	10-3	2	F	1	100	10	1
2013-07-16	10-3	2	F	1	100	25	1
2013-07-16	10-3	2	F	1	100	50	1
2013-07-16	10-3	2	F	1	100	100	0
2013-07-09	9-4	1	F	1	5	10	1
2013-07-09	9-4	1	F	1	5	25	1
2013-07-09	9-4	1	F	1	5	50	0
2013-07-09	9-4	1	F	1	5	100	0
2013-07-09	9-4	1	F	1	25	10	1
2013-07-09	9-4	1	F	1	25	25	1
2013-07-09	9-4	1	F	1	25	50	1
2013-07-09	9-4	1	F	1	25	100	1
2013-07-09	9-4	1	F	1	50	10	1
2013-07-09	9-4	1	F	1	50	25	1
2013-07-09	9-4	1	F	1	50	50	1
2013-07-09	9-4	1	F	1	50	100	1
2013-07-09	9-4	1	F	1	100	10	1
2013-07-09	9-4	1	F	1	100	25	1
2013-07-09	9-4	1	F	1	100	50	1
2013-07-09	9-4	1	F	1	100	100	1
2013-07-09	9-4	2	F	1	5	10	0
2013-07-09	9-4	2	F	1	5	25	0
2013-07-09	9-4	2	F	1	5	50	0
2013-07-09	9-4	2	F	1	5	100	0
2013-07-09	9-4	2	F	1	25	10	1
2013-07-09	9-4	2	F	1	25	25	1
2013-07-09	9-4	2	F	1	25	50	1
2013-07-09	9-4	2	F	1	25	100	0
2013-07-09	9-4	2	F	1	50	10	1
2013-07-09	9-4	2	F	1	50	25	1
2013-07-09	9-4	2	F	1	50	50	1
2013-07-09	9-4	2	F	1	50	100	1
2013-07-09	9-4	2	F	1	100	10	1
2013-07-09	9-4	2	F	1	100	25	1
2013-07-09	9-4	2	F	1	100	50	1
2013-07-09	9-4	2	F	1	100	100	1
2014-07-24	26-4	2	F	4	5	10	0
2014-07-24	26-4	2	F	4	5	25	0
2014-07-24	26-4	2	F	4	5	50	0
2014-07-24	26-4	2	F	4	5	100	0
2014-07-24	26-4	2	F	4	25	10	1
2014-07-24	26-4	2	F	4	25	25	1
2014-07-24	26-4	2	F	4	25	50	0
2014-07-24	26-4	2	F	4	25	100	0
2014-07-24	26-4	2	F	4	50	10	1
2014-07-24	26-4	2	F	4	50	25	1
2014-07-24	26-4	2	F	4	50	50	0
2014-07-24	26-4	2	F	4	50	100	0
2014-07-24	26-4	2	F	4	100	10	1
2014-07-24	26-4	2	F	4	100	25	1
2014-07-24	26-4	2	F	4	100	50	1
2014-07-24	26-4	2	F	4	100	100	0
2015-02-04	29-2	2	F	4	5	10	0
2015-02-04	29-2	2	F	4	5	25	0
2015-02-04	29-2	2	F	4	5	50	0
2015-02-04	29-2	2	F	4	5	100	0
2015-02-04	29-2	2	F	4	25	10	0
2015-02-04	29-2	2	F	4	25	25	0
2015-02-04	29-2	2	F	4	25	50	0
2015-02-04	29-2	2	F	4	25	100	0
2015-02-04	29-2	2	F	4	50	10	1
2015-02-04	29-2	2	F	4	50	25	0
2015-02-04	29-2	2	F	4	50	50	0
2015-02-04	29-2	2	F	4	50	100	0
2015-02-04	29-2	2	F	4	100	10	1
2015-02-04	29-2	2	F	4	100	25	1
2015-02-04	29-2	2	F	4	100	50	0
2015-02-04	29-2	2	F	4	100	100	0
2015-02-13	29-5	1	F	4	5	10	0
2015-02-13	29-5	1	F	4	5	25	0
2015-02-13	29-5	1	F	4	5	50	0
2015-02-13	29-5	1	F	4	5	100	0
2015-02-13	29-5	1	F	4	25	10	1
2015-02-13	29-5	1	F	4	25	25	0
2015-02-13	29-5	1	F	4	25	50	0
2015-02-13	29-5	1	F	4	25	100	0
2015-02-13	29-5	1	F	4	50	10	1
2015-02-13	29-5	1	F	4	50	25	0
2015-02-13	29-5	1	F	4	50	50	0
2015-02-13	29-5	1	F	4	50	100	0
2015-02-13	29-5	1	F	4	100	10	1
2015-02-13	29-5	1	F	4	100	25	1
2015-02-13	29-5	1	F	4	100	50	1
2015-02-13	29-5	1	F	4	100	100	1
2015-03-13	30-4	1	F	4	5	10	0
2015-03-13	30-4	1	F	4	5	25	0
2015-03-13	30-4	1	F	4	5	50	0
2015-03-13	30-4	1	F	4	5	100	0
2015-03-13	30-4	1	F	4	25	10	1
2015-03-13	30-4	1	F	4	25	25	0
2015-03-13	30-4	1	F	4	25	50	0
2015-03-13	30-4	1	F	4	25	100	0
2015-03-13	30-4	1	F	4	50	10	1
2015-03-13	30-4	1	F	4	50	25	0
2015-03-13	30-4	1	F	4	50	50	0
2015-03-13	30-4	1	F	4	50	100	0
2015-03-13	30-4	1	F	4	100	10	1
2015-03-13	30-4	1	F	4	100	25	1
2015-03-13	30-4	1	F	4	100	50	0
2015-03-13	30-4	1	F	4	100	100	0
2015-03-20	30-8	1	F	4	5	10	0
2015-03-20	30-8	1	F	4	5	25	0
2015-03-20	30-8	1	F	4	5	50	0
2015-03-20	30-8	1	F	4	5	100	0
2015-03-20	30-8	1	F	4	25	10	1
2015-03-20	30-8	1	F	4	25	25	0
2015-03-20	30-8	1	F	4	25	50	0
2015-03-20	30-8	1	F	4	25	100	0
2015-03-20	30-8	1	F	4	50	10	1
2015-03-20	30-8	1	F	4	50	25	0
2015-03-20	30-8	1	F	4	50	50	0
2015-03-20	30-8	1	F	4	50	100	0
2015-03-20	30-8	1	F	4	100	10	1
2015-03-20	30-8	1	F	4	100	25	1
2015-03-20	30-8	1	F	4	100	50	0
2015-03-20	30-8	1	F	4	100	100	0
2015-03-20	30-8	2	F	4	5	10	0
2015-03-20	30-8	2	F	4	5	25	0
2015-03-20	30-8	2	F	4	5	50	0
2015-03-20	30-8	2	F	4	5	100	0
2015-03-20	30-8	2	F	4	25	10	1
2015-03-20	30-8	2	F	4	25	25	0
2015-03-20	30-8	2	F	4	25	50	0
2015-03-20	30-8	2	F	4	25	100	0
2015-03-20	30-8	2	F	4	50	10	1
2015-03-20	30-8	2	F	4	50	25	0
2015-03-20	30-8	2	F	4	50	50	0
2015-03-20	30-8	2	F	4	50	100	0
2015-03-20	30-8	2	F	4	100	10	1
2015-03-20	30-8	2	F	4	100	25	1
2015-03-20	30-8	2	F	4	100	50	0
2015-03-20	30-8	2	F	4	100	100	0
2015-03-20	30-8	2	F	4	5	10	0
2015-03-20	30-8	2	F	4	5	25	0
2015-03-20	30-8	2	F	4	5	50	0
2015-03-20	30-8	2	F	4	5	100	0
2015-03-20	30-8	2	F	4	25	10	0
2015-03-20	30-8	2	F	4	25	25	0
2015-03-20	30-8	2	F	4	25	50	0
2015-03-20	30-8	2	F	4	25	100	0
2015-03-20	30-8	2	F	4	50	10	0
2015-03-20	30-8	2	F	4	50	25	0
2015-03-20	30-8	2	F	4	50	50	0
2015-03-20	30-8	2	F	4	50	100	0
2015-03-20	30-8	2	F	4	100	10	1
2015-03-20	30-8	2	F	4	100	25	0
2015-03-20	30-8	2	F	4	100	50	0
2015-03-20	30-8	2	F	4	100	100	0
2013-07-11	9-6	1	F	4	5	10	0
2013-07-11	9-6	1	F	4	5	25	0
2013-07-11	9-6	1	F	4	5	50	0
2013-07-11	9-6	1	F	4	5	100	0
2013-07-11	9-6	1	F	4	25	10	0
2013-07-11	9-6	1	F	4	25	25	0
2013-07-11	9-6	1	F	4	25	50	0
2013-07-11	9-6	1	F	4	25	100	0
2013-07-11	9-6	1	F	4	50	10	1
2013-07-11	9-6	1	F	4	50	25	1
2013-07-11	9-6	1	F	4	50	50	0
2013-07-11	9-6	1	F	4	50	100	0
2013-07-11	9-6	1	F	4	100	10	1
2013-07-11	9-6	1	F	4	100	25	1
2013-07-11	9-6	1	F	4	100	50	1
2013-07-11	9-6	1	F	4	100	100	0
2013-07-11	9-6	2	F	4	5	10	0
2013-07-11	9-6	2	F	4	5	25	0
2013-07-11	9-6	2	F	4	5	50	0
2013-07-11	9-6	2	F	4	5	100	0
2013-07-11	9-6	2	F	4	25	10	1
2013-07-11	9-6	2	F	4	25	25	0
2013-07-11	9-6	2	F	4	25	50	0
2013-07-11	9-6	2	F	4	25	100	0
2013-07-11	9-6	2	F	4	50	10	1
2013-07-11	9-6	2	F	4	50	25	0
2013-07-11	9-6	2	F	4	50	50	0
2013-07-11	9-6	2	F	4	50	100	0
2013-07-11	9-6	2	F	4	100	10	1
2013-07-11	9-6	2	F	4	100	25	1
2013-07-11	9-6	2	F	4	100	50	0
2013-07-11	9-6	2	F	4	100	100	0
2013-07-23	10-6	1	F	4	5	10	0
2013-07-23	10-6	1	F	4	5	25	0
2013-07-23	10-6	1	F	4	5	50	0
2013-07-23	10-6	1	F	4	5	100	0
2013-07-23	10-6	1	F	4	25	10	1
2013-07-23	10-6	1	F	4	25	25	1
2013-07-23	10-6	1	F	4	25	50	0
2013-07-23	10-6	1	F	4	25	100	0
2013-07-23	10-6	1	F	4	50	10	1
2013-07-23	10-6	1	F	4	50	25	1
2013-07-23	10-6	1	F	4	50	50	1
2013-07-23	10-6	1	F	4	50	100	1
2013-07-23	10-6	1	F	4	100	10	1
2013-07-23	10-6	1	F	4	100	25	1
2013-07-23	10-6	1	F	4	100	50	1
2013-07-23	10-6	1	F	4	100	100	1
2014-07-14	25-4	1	F	4	5	10	0
2014-07-14	25-4	1	F	4	5	25	0
2014-07-14	25-4	1	F	4	5	50	0
2014-07-14	25-4	1	F	4	5	100	0
2014-07-14	25-4	1	F	4	25	10	1
2014-07-14	25-4	1	F	4	25	25	0
2014-07-14	25-4	1	F	4	25	50	0
2014-07-14	25-4	1	F	4	25	100	0
2014-07-14	25-4	1	F	4	50	10	1
2014-07-14	25-4	1	F	4	50	25	1
2014-07-14	25-4	1	F	4	50	50	0
2014-07-14	25-4	1	F	4	50	100	0
2014-07-14	25-4	1	F	4	100	10	1
2014-07-14	25-4	1	F	4	100	25	1
2014-07-14	25-4	1	F	4	100	50	1
2014-07-14	25-4	1	F	4	100	100	1
2016-06-17	L1	1a	F	4	5	10	1
2016-06-17	L1	1a	F	4	5	25	0
2016-06-17	L1	1a	F	4	5	50	0
2016-06-17	L1	1a	F	4	5	100	0
2016-06-17	L1	1a	F	4	25	10	1
2016-06-17	L1	1a	F	4	25	25	1
2016-06-17	L1	1a	F	4	25	50	1
2016-06-17	L1	1a	F	4	25	100	0
2016-06-17	L1	1a	F	4	50	10	1
2016-06-17	L1	1a	F	4	50	25	1
2016-06-17	L1	1a	F	4	50	50	1
2016-06-17	L1	1a	F	4	50	100	1
2016-06-17	L1	1a	F	4	100	10	1
2016-06-17	L1	1a	F	4	100	25	1
2016-06-17	L1	1a	F	4	100	50	1
2016-06-17	L1	1a	F	4	100	100	1
2016-06-17	L1	1c	F	4	5	10	1
2016-06-17	L1	1c	F	4	5	25	0
2016-06-17	L1	1c	F	4	5	50	0
2016-06-17	L1	1c	F	4	5	100	0
2016-06-17	L1	1c	F	4	25	10	1
2016-06-17	L1	1c	F	4	25	25	0
2016-06-17	L1	1c	F	4	25	50	0
2016-06-17	L1	1c	F	4	25	100	0
2016-06-17	L1	1c	F	4	50	10	1
2016-06-17	L1	1c	F	4	50	25	1
2016-06-17	L1	1c	F	4	50	50	0
2016-06-17	L1	1c	F	4	50	100	0
2016-06-17	L1	1c	F	4	100	10	1
2016-06-17	L1	1c	F	4	100	25	1
2016-06-17	L1	1c	F	4	100	50	1
2016-06-17	L1	1c	F	4	100	100	1
2016-06-17	L1	2d	F	4	5	10	0
2016-06-17	L1	2d	F	4	5	25	0
2016-06-17	L1	2d	F	4	5	50	0
2016-06-17	L1	2d	F	4	5	100	0
2016-06-17	L1	2d	F	4	25	10	1
2016-06-17	L1	2d	F	4	25	25	0
2016-06-17	L1	2d	F	4	25	50	0
2016-06-17	L1	2d	F	4	25	100	0
2016-06-17	L1	2d	F	4	50	10	1
2016-06-17	L1	2d	F	4	50	25	0
2016-06-17	L1	2d	F	4	50	50	0
2016-06-17	L1	2d	F	4	50	100	0
2016-06-17	L1	2d	F	4	100	10	1
2016-06-17	L1	2d	F	4	100	25	0
2016-06-17	L1	2d	F	4	100	50	0
2016-06-17	L1	2d	F	4	100	100	0
2016-06-23	L3	2b	F	4	5	10	0
2016-06-23	L3	2b	F	4	5	25	0
2016-06-23	L3	2b	F	4	5	50	0
2016-06-23	L3	2b	F	4	5	100	0
2016-06-23	L3	2b	F	4	25	10	0
2016-06-23	L3	2b	F	4	25	25	0
2016-06-23	L3	2b	F	4	25	50	0
2016-06-23	L3	2b	F	4	25	100	0
2016-06-23	L3	2b	F	4	50	10	1
2016-06-23	L3	2b	F	4	50	25	0
2016-06-23	L3	2b	F	4	50	50	0
2016-06-23	L3	2b	F	4	50	100	0
2016-06-23	L3	2b	F	4	100	10	1
2016-06-23	L3	2b	F	4	100	25	1
2016-06-23	L3	2b	F	4	100	50	0
2016-06-23	L3	2b	F	4	100	100	0
2016-06-29	L4	1a	F	4	5	10	0
2016-06-29	L4	1a	F	4	5	25	0
2016-06-29	L4	1a	F	4	5	50	0
2016-06-29	L4	1a	F	4	5	100	0
2016-06-29	L4	1a	F	4	25	10	0
2016-06-29	L4	1a	F	4	25	25	0
2016-06-29	L4	1a	F	4	25	50	0
2016-06-29	L4	1a	F	4	25	100	0
2016-06-29	L4	1a	F	4	50	10	0
2016-06-29	L4	1a	F	4	50	25	0
2016-06-29	L4	1a	F	4	50	50	0
2016-06-29	L4	1a	F	4	50	100	0
2016-06-29	L4	1a	F	4	100	10	0
2016-06-29	L4	1a	F	4	100	25	0
2016-06-29	L4	1a	F	4	100	50	0
2016-06-29	L4	1a	F	4	100	100	0
2016-07-05	L5	1a	F	4	5	10	0
2016-07-05	L5	1a	F	4	5	25	0
2016-07-05	L5	1a	F	4	5	50	0
2016-07-05	L5	1a	F	4	5	100	0
2016-07-05	L5	1a	F	4	25	10	1
2016-07-05	L5	1a	F	4	25	25	0
2016-07-05	L5	1a	F	4	25	50	0
2016-07-05	L5	1a	F	4	25	100	0
2016-07-05	L5	1a	F	4	50	10	1
2016-07-05	L5	1a	F	4	50	25	1
2016-07-05	L5	1a	F	4	50	50	0
2016-07-05	L5	1a	F	4	50	100	0
2016-07-05	L5	1a	F	4	100	10	1
2016-07-05	L5	1a	F	4	100	25	1
2016-07-05	L5	1a	F	4	100	50	1
2016-07-05	L5	1a	F	4	100	100	0
2016-07-05	L5	2a	F	4	5	10	0
2016-07-05	L5	2a	F	4	5	25	0
2016-07-05	L5	2a	F	4	5	50	0
2016-07-05	L5	2a	F	4	5	100	0
2016-07-05	L5	2a	F	4	25	10	1
2016-07-05	L5	2a	F	4	25	25	1
2016-07-05	L5	2a	F	4	25	50	0
2016-07-05	L5	2a	F	4	25	100	0
2016-07-05	L5	2a	F	4	50	10	1
2016-07-05	L5	2a	F	4	50	25	1
2016-07-05	L5	2a	F	4	50	50	1
2016-07-05	L5	2a	F	4	50	100	1
2016-07-05	L5	2a	F	4	100	10	1
2016-07-05	L5	2a	F	4	100	25	1
2016-07-05	L5	2a	F	4	100	50	1
2016-07-05	L5	2a	F	4	100	100	1
2016-07-05	L5	2b	F	4	5	10	0
2016-07-05	L5	2b	F	4	5	25	0
2016-07-05	L5	2b	F	4	5	50	0
2016-07-05	L5	2b	F	4	5	100	0
2016-07-05	L5	2b	F	4	25	10	1
2016-07-05	L5	2b	F	4	25	25	1
2016-07-05	L5	2b	F	4	25	50	0
2016-07-05	L5	2b	F	4	25	100	0
2016-07-05	L5	2b	F	4	50	10	1
2016-07-05	L5	2b	F	4	50	25	1
2016-07-05	L5	2b	F	4	50	50	0
2016-07-05	L5	2b	F	4	50	100	0
2016-07-05	L5	2b	F	4	100	10	1
2016-07-05	L5	2b	F	4	100	25	1
2016-07-05	L5	2b	F	4	100	50	1
2016-07-05	L5	2b	F	4	100	100	0
2016-06-17	L1	2a	F	4	5	10	0
2016-06-17	L1	2a	F	4	5	25	0
2016-06-17	L1	2a	F	4	5	50	0
2016-06-17	L1	2a	F	4	5	100	0
2016-06-17	L1	2a	F	4	25	10	0
2016-06-17	L1	2a	F	4	25	25	0
2016-06-17	L1	2a	F	4	25	50	0
2016-06-17	L1	2a	F	4	25	100	0
2016-06-17	L1	2a	F	4	50	10	0
2016-06-17	L1	2a	F	4	50	25	0
2016-06-17	L1	2a	F	4	50	50	0
2016-06-17	L1	2a	F	4	50	100	0
2016-06-17	L1	2a	F	4	100	10	1
2016-06-17	L1	2a	F	4	100	25	1
2016-06-17	L1	2a	F	4	100	50	0
2016-06-17	L1	2a	F	4	100	100	0
2016-06-21	L2	1c	F	4	5	10	0
2016-06-21	L2	1c	F	4	5	25	0
2016-06-21	L2	1c	F	4	5	50	0
2016-06-21	L2	1c	F	4	5	100	0
2016-06-21	L2	1c	F	4	25	10	0
2016-06-21	L2	1c	F	4	25	25	0
2016-06-21	L2	1c	F	4	25	50	0
2016-06-21	L2	1c	F	4	25	100	0
2016-06-21	L2	1c	F	4	50	10	1
2016-06-21	L2	1c	F	4	50	25	1
2016-06-21	L2	1c	F	4	50	50	1
2016-06-21	L2	1c	F	4	50	100	0
2016-06-21	L2	1c	F	4	100	10	1
2016-06-21	L2	1c	F	4	100	25	1
2016-06-21	L2	1c	F	4	100	50	1
2016-06-21	L2	1c	F	4	100	100	1
2016-06-24	S2	1a	F	1	5	10	0
2016-06-24	S2	1a	F	1	5	25	0
2016-06-24	S2	1a	F	1	5	50	0
2016-06-24	S2	1a	F	1	5	100	0
2016-06-24	S2	1a	F	1	25	10	0
2016-06-24	S2	1a	F	1	25	25	0
2016-06-24	S2	1a	F	1	25	50	0
2016-06-24	S2	1a	F	1	25	100	0
2016-06-24	S2	1a	F	1	50	10	0
2016-06-24	S2	1a	F	1	50	25	0
2016-06-24	S2	1a	F	1	50	50	0
2016-06-24	S2	1a	F	1	50	100	0
2016-06-24	S2	1a	F	1	100	10	1
2016-06-24	S2	1a	F	1	100	25	0
2016-06-24	S2	1a	F	1	100	50	0
2016-06-24	S2	1a	F	1	100	100	0
2016-06-24	S2	1b	F	1	5	10	0
2016-06-24	S2	1b	F	1	5	25	0
2016-06-24	S2	1b	F	1	5	50	0
2016-06-24	S2	1b	F	1	5	100	0
2016-06-24	S2	1b	F	1	25	10	0
2016-06-24	S2	1b	F	1	25	25	0
2016-06-24	S2	1b	F	1	25	50	0
2016-06-24	S2	1b	F	1	25	100	0
2016-06-24	S2	1b	F	1	50	10	0
2016-06-24	S2	1b	F	1	50	25	0
2016-06-24	S2	1b	F	1	50	50	0
2016-06-24	S2	1b	F	1	50	100	0
2016-06-24	S2	1b	F	1	100	10	0
2016-06-24	S2	1b	F	1	100	25	0
2016-06-24	S2	1b	F	1	100	50	0
2016-06-24	S2	1b	F	1	100	100	0
2016-06-24	S2	2c	F	1	5	10	0
2016-06-24	S2	2c	F	1	5	25	0
2016-06-24	S2	2c	F	1	5	50	0
2016-06-24	S2	2c	F	1	5	100	0
2016-06-24	S2	2c	F	1	25	10	0
2016-06-24	S2	2c	F	1	25	25	0
2016-06-24	S2	2c	F	1	25	50	0
2016-06-24	S2	2c	F	1	25	100	0
2016-06-24	S2	2c	F	1	50	10	0
2016-06-24	S2	2c	F	1	50	25	0
2016-06-24	S2	2c	F	1	50	50	0
2016-06-24	S2	2c	F	1	50	100	0
2016-06-24	S2	2c	F	1	100	10	0
2016-06-24	S2	2c	F	1	100	25	0
2016-06-24	S2	2c	F	1	100	50	0
2016-06-24	S2	2c	F	1	100	100	0
2016-07-06	S3	1b	F	1	5	10	0
2016-07-06	S3	1b	F	1	5	25	0
2016-07-06	S3	1b	F	1	5	50	0
2016-07-06	S3	1b	F	1	5	100	0
2016-07-06	S3	1b	F	1	25	10	1
2016-07-06	S3	1b	F	1	25	25	0
2016-07-06	S3	1b	F	1	25	50	0
2016-07-06	S3	1b	F	1	25	100	0
2016-07-06	S3	1b	F	1	50	10	1
2016-07-06	S3	1b	F	1	50	25	1
2016-07-06	S3	1b	F	1	50	50	1
2016-07-06	S3	1b	F	1	50	100	1
2016-07-06	S3	1b	F	1	100	10	1
2016-07-06	S3	1b	F	1	100	25	1
2016-07-06	S3	1b	F	1	100	50	1
2016-07-06	S3	1b	F	1	100	100	1
2016-07-06	S3	2b	F	1	5	10	1
2016-07-06	S3	2b	F	1	5	25	0
2016-07-06	S3	2b	F	1	5	50	0
2016-07-06	S3	2b	F	1	5	100	0
2016-07-06	S3	2b	F	1	25	10	1
2016-07-06	S3	2b	F	1	25	25	0
2016-07-06	S3	2b	F	1	25	50	0
2016-07-06	S3	2b	F	1	25	100	0
2016-07-06	S3	2b	F	1	50	10	1
2016-07-06	S3	2b	F	1	50	25	1
2016-07-06	S3	2b	F	1	50	50	0
2016-07-06	S3	2b	F	1	50	100	0
2016-07-06	S3	2b	F	1	100	10	1
2016-07-06	S3	2b	F	1	100	25	1
2016-07-06	S3	2b	F	1	100	50	1
2016-07-06	S3	2b	F	1	100	100	1
2016-06-22	S1	1b	F	1	5	10	0
2016-06-22	S1	1b	F	1	5	25	0
2016-06-22	S1	1b	F	1	5	50	0
2016-06-22	S1	1b	F	1	5	100	0
2016-06-22	S1	1b	F	1	25	10	0
2016-06-22	S1	1b	F	1	25	25	0
2016-06-22	S1	1b	F	1	25	50	0
2016-06-22	S1	1b	F	1	25	100	0
2016-06-22	S1	1b	F	1	50	10	0
2016-06-22	S1	1b	F	1	50	25	0
2016-06-22	S1	1b	F	1	50	50	0
2016-06-22	S1	1b	F	1	50	100	0
2016-06-22	S1	1b	F	1	100	10	1
2016-06-22	S1	1b	F	1	100	25	0
2016-06-22	S1	1b	F	1	100	50	0
2016-06-22	S1	1b	F	1	100	100	0
2016-07-06	S3	2a	F	1	5	10	0
2016-07-06	S3	2a	F	1	5	25	0
2016-07-06	S3	2a	F	1	5	50	0
2016-07-06	S3	2a	F	1	5	100	0
2016-07-06	S3	2a	F	1	25	10	1
2016-07-06	S3	2a	F	1	25	25	0
2016-07-06	S3	2a	F	1	25	50	0
2016-07-06	S3	2a	F	1	25	100	0
2016-07-06	S3	2a	F	1	50	10	1
2016-07-06	S3	2a	F	1	50	25	1
2016-07-06	S3	2a	F	1	50	50	0
2016-07-06	S3	2a	F	1	50	100	0
2016-07-06	S3	2a	F	1	100	10	1
2016-07-06	S3	2a	F	1	100	25	1
2016-07-06	S3	2a	F	1	100	50	1
2016-07-06	S3	2a	F	1	100	100	1
2016-07-06	S3	1c	F	1	5	10	0
2016-07-06	S3	1c	F	1	5	25	0
2016-07-06	S3	1c	F	1	5	50	0
2016-07-06	S3	1c	F	1	5	100	0
2016-07-06	S3	1c	F	1	25	10	0
2016-07-06	S3	1c	F	1	25	25	0
2016-07-06	S3	1c	F	1	25	50	0
2016-07-06	S3	1c	F	1	25	100	0
2016-07-06	S3	1c	F	1	50	10	0
2016-07-06	S3	1c	F	1	50	25	0
2016-07-06	S3	1c	F	1	50	50	0
2016-07-06	S3	1c	F	1	50	100	0
2016-07-06	S3	1c	F	1	100	10	1
2016-07-06	S3	1c	F	1	100	25	0
2016-07-06	S3	1c	F	1	100	50	0
2016-07-06	S3	1c	F	1	100	100	0
2016-07-07	S4	1b	F	1	5	10	0
2016-07-07	S4	1b	F	1	5	25	0
2016-07-07	S4	1b	F	1	5	50	0
2016-07-07	S4	1b	F	1	5	100	0
2016-07-07	S4	1b	F	1	25	10	1
2016-07-07	S4	1b	F	1	25	25	0
2016-07-07	S4	1b	F	1	25	50	0
2016-07-07	S4	1b	F	1	25	100	0
2016-07-07	S4	1b	F	1	50	10	1
2016-07-07	S4	1b	F	1	50	25	0
2016-07-07	S4	1b	F	1	50	50	0
2016-07-07	S4	1b	F	1	50	100	0
2016-07-07	S4	1b	F	1	100	10	1
2016-07-07	S4	1b	F	1	100	25	0
2016-07-07	S4	1b	F	1	100	50	0
2016-07-07	S4	1b	F	1	100	100	0
2016-07-07	S4	2a	F	1	5	10	0
2016-07-07	S4	2a	F	1	5	25	0
2016-07-07	S4	2a	F	1	5	50	0
2016-07-07	S4	2a	F	1	5	100	0
2016-07-07	S4	2a	F	1	25	10	0
2016-07-07	S4	2a	F	1	25	25	0
2016-07-07	S4	2a	F	1	25	50	0
2016-07-07	S4	2a	F	1	25	100	0
2016-07-07	S4	2a	F	1	50	10	0
2016-07-07	S4	2a	F	1	50	25	0
2016-07-07	S4	2a	F	1	50	50	0
2016-07-07	S4	2a	F	1	50	100	0
2016-07-07	S4	2a	F	1	100	10	1
2016-07-07	S4	2a	F	1	100	25	0
2016-07-07	S4	2a	F	1	100	50	0
2016-07-07	S4	2a	F	1	100	100	0

## Sheet: Muscle Mechanical Properties
File Name	Animal #	Age (Days)	Muscle mass (g)	LO (mm)	CSA (mm2)	CSA (cm2)	Muscle #	Drug	Condition	Sex	Stretch length	Stretch speed	BL tension (mN)	Peak tension (mN)	Plateau tension (mN)	Sex	BL Stress (g/mm^2)	Peak Stress (g/mm^2)	Pleateau Stress (g/mm^2)	ESE (Mpa)	EPE (Mpa)
150204_2a_RVT_F_RT_LPS	29-22a	59	0.00762	12.18	0.592439	0.00592439	2	LPS	1	F	0.05	40	4.80546	38.8246	22.9665	F	0.813333	5.74333	3.06667	2.27051	1.48248
150213_1b_RVT_F_RT_LPS	29-51b	68	0.00537	11.05	0.460202	0.00460202	1	LPS	1	F	0.05	40	3.0281	23.4722	14.3791	F	0.66	4.44	2.46667	1.75814	1.22635
150218_1b_RVT_F_RT_LPS	29-61b	73	0.00613	10.9	0.532562	0.00532562	1	LPS	1	F	0.05	40	1.8846	14.9325	9.54156	F	0.353333	2.45	1.43667	0.971191	0.713778
150313_1c_RVT_RT_LPS	30-41c	69	0.00649	8.87	0.692879	0.00692879	1	LPS	1	F	0.05	40	1.33726	10.2763	6.43101	F	0.196667	1.32667	0.736667	0.510857	0.380526
150320_1b_RVT_F_RT_LPS	30-81b	76	0.00714	10.82	0.624895	0.00624895	1	LPS	1	F	0.05	40	3.90491	26.1153	16.297	F	0.623333	3.55333	1.98333	1.40765	0.983762
150320_2b_RVT_F_RT_LPS	30-82b	76	0.007	12.39	0.535011	0.00535011	2	LPS	1	F	0.05	40	6.15041	46.372	29.0159	F	1.15	7.51667	4.27667	2.97161	1.94609
150206_1a_RVT_F_RT_SAL	29-31a	61	0.00659	11.96	0.521783	0.00521783	1	SAL	0	F	0.05	40	5.2293	22.5658	15.1138	F	1	3.32333	1.21	1.42151	0.736231
150211_1b_RVT_F_RT_SAL	29-41b	56	0.00897	11.73	0.724153	0.00724153	1	SAL	0	F	0.05	40	6.10348	40.1127	22.6708	F	0.843333	4.69667	2.28667	1.85877	1.38966
150304_2a_RVT_F_RT_SAL	30-12a	60	0.0057	11.64	0.463722	0.00463722	2	SAL	0	F	0.05	40	3.74952	20.7052	12.6998	F	0.81	3.65667	1.93	1.72381	1.22368
150311_1a_RVT__F_RT_SAL	30-31a	67	0.0096	12.15	0.748223	0.00748223	1	SAL	0	F	0.05	40	3.57051	11.8602	8.4252	F	0.476667	1.10667	0.646667	0.886053	0.744888
160617_1a_RVT_RT_LPS	L11a	59	0.00629	9.92	0.600448	0.00600448	1	LPS	1	F	0.05	40	5.33695	22.7424	15.099	F	0.886667	2.9	1.62333	1.14695	0.819292
160617_2a_RVT_RT_LPS	L12a	59	0.0079	11.25	0.664983	0.00664983	2	LPS	1	F	0.05	40	4.79445	21.0844	13.7852	F	0.72	2.45	1.35	0.969903	0.76926
160621_1a_RVT_RT_LPS	L21a	63	0.00808	10.96	0.698130944_x000D_	0.00698131	1	LPS	1	F	0.05	40	4.38066	27.1115	15.099	F	0.63	3.26	2.1	1.13	0.847
160623_2a_RVT_RT_LPS	L32a	65	0.00902	12.64	0.675765	0.00675765	2	LPS	1	F	0.05	40	5.43826	35.5682	17.9457	F	0.803333	4.46333	1.85333	1.76611	1.20018
160629_1a_RVT_RT_LPS	L41a	71	0.00643	10.29	0.591741	0.00591741	1	LPS	1	F	0.05	40	4.49174	32.8049	19.562	F	0.756667	4.78333	2.54667	1.89135	1.20029
160705_1a_RVT_RT_LPS	L51a	77	0.00817	11.41	0.678067	0.00678067	1	LPS	1	F	0.05	40	4.80209	29.9269	15.683	F	0.706667	3.70667	1.60333	1.46757	0.848899
160705_2a_RVT_RT_LPS	L52a	77	0.01024	9.97	0.972615	0.00972615	2	LPS	1	F	0.05	40	3.50022	29.4473	15.537	F	0.356667	2.67	1.23667	1.05361	0.600388
160622_1a_RVT_RT_SAL	S11a	64	0.00553	8.57	0.611055	0.00611055	1	SAL	0	F	0.05	40	5.71081	21.6162	14.9322	F	0.933333	2.60333	1.51	1.03044	0.7798
160622_2a_RVT_RT_SAL	S12a	64	0.0051	11.86	0.407213	0.00407213	2	SAL	0	F	0.05	40	3.9054	16.2565	11.2826	F	0.956667	3.03333	1.81333	1.2014	0.779001
160624_1a_RVT_RT_SAL	S21a	66	0.00864	11.12	0.735775	0.00735775	1	SAL	0	F	0.05	40	3.29897	15.1616	9.71843	F	0.45	1.61333	0.873333	0.639479	0.483577
160624_2a_RVT_RT_SAL	S22a	66	0.00735	9.41	0.739663	0.00739663	2	SAL	0	F	0.05	40	7.00068	29.343	18.9363	F	0.946667	3.02	1.61333	1.20031	0.900931
160706_1a_RVT_RT_SAL	S31a	78	0.00734	11.34	0.612942	0.00612942	1	SAL	0	F	0.05	40	5.83636	28.2794	18.0917	F	0.953333	3.66	2	1.47738	1.01346
160706_2a_RVT_RT_SAL	S32a	78	0.00862	10.13	0.805812	0.00805812	2	SAL	0	F	0.05	40	4.32483	27.4556	16.684	F	0.54	2.87	1.53333	1.13465	0.739629
160707_1a_RVT_RT_SAL	S41a	79	0.01019	11.5	0.839097	0.00839097	1	SAL	0	F	0.05	40	5.3115	20.7716	13.6392	F	0.633333	1.84	0.993333	0.730538	0.541168
160707_2a_RVT_RT_SAL	S42a	79	0.00903	13.04	0.655762	0.00655762	2	SAL	0	F	0.05	40	4.53859	20.709	12.4713	F	0.693333	2.46667	1.21	0.975892	0.668792
140710_1a_SAL	25-2	59	0.00953	11.13	0.810837	0.00810837	1	SAL	0	F	0.05	40	7.48162	62.0278	38.482	F	0.922703	6.72714	3.82325	2.67585	1.88004
140714_1d_LPS	25-4	63	0.01003	12.31	0.771576	0.00771576	1	LPS	1	F	0.05	40	6.43461	82.7462	44.7262	F	0.833956	9.89035	4.96277	3.92941	2.53795
140723_2a_SAL	26-3	72	0.00942	11.21	0.795759	0.00795759	2	SAL	0	F	0.05	40	6.28451	50.5555	30.3968	F	0.789751	5.56337	3.0301	1.81992	1.19284
140724_2a_LPS	26-4	73	0.00659	11.96	0.521783	0.00521783	2	LPS	1	F	0.05	40	6.38157	51.2165	31.1224	F	1.22303	8.59263	4.74158	2.81308	1.93081
130709_2a_SAL	9_4	67	0.00846	10.9	0.734987	0.00734987	2	SAL	0	F	0.05	40	2.26751	38.6458	23.1507	F	0.30851	4.94952	2.8413	0.978895	0.685585
130711_1a_LPS	9_6	69	0.00929	10	0.879735	0.00879735	1	LPS	1	F	0.05	40	4.56375	34.1667	21.719	F	0.518764	3.36498	1.95005	0.664819	0.467678
130716_2a_SAL	10_3	74	0.00864	10	0.818182	0.00818182	2	SAL	0	F	0.05	40	1.49446	32.4062	19.3614	F	0.182656	3.77811	2.18373	0.746629	0.538006
130723_1a_LPS	10_6	81	0.00869	12.2	0.674522	0.00674522	1	LPS	1	F	0.05	40	5.12739	47.9583	30.4535	F	0.760151	6.34982	3.75468	1.2532	0.833567
130711_2a_LPS	9_6	69	0.00981	11.1	0.836916	0.00836916	2	LPS	1	F	0.05	40	4.58331	35.8229	22.813	F	0.547642	3.7327	2.1782	0.738548	0.50662
160205_1b_SAL	32-1	48	0.00759	11.84	0.607052	0.00607052	1	SAL	0	M	0.05	40	1.18168	16.7315	9.21959	M	0.194658	2.56153	1.32409	1.02645	0.807986
160210_1c_SAL	32-2	53	0.0076	11.64	0.618296	0.00618296	1	SAL	0	M	0.05	40	4.03407	40.3609	23.1017	M	0.652449	5.87531	3.08391	2.33848	1.57649
160217_2c_SAL	32-4	60	0.00925	10.47	0.836626	0.00836626	2	SAL	0	M	0.05	40	4.29695	15.8585	9.72806	M	0.513605	1.38192	0.649169	0.547583	0.489387
160226_2c_SAL	32-7	69	0.00842	12.31	0.647724	0.00647724	2	SAL	0	M	0.05	40	4.58901	20.2044	13.0763	M	0.708481	2.41081	1.31032	0.953839	0.70093
160302_1b_LPS	32-8	74	0.011	12.3	0.846883	0.00846883	1	LPS	1	M	0.05	40	3.77325	33.9619	17.4127	M	0.445546	3.56467	1.61054	1.41014	0.886611
160309_1b_LPS	32-10	81	0.012	11.29	1.00652	0.0100652	1	LPS	1	M	0.05	40	4.20809	28.5388	18.2148	M	0.418082	2.41731	1.3916	0.585323	0.402801
160309_2d_LPS	32-10	81	0.007	11.81	0.561286	0.00561286	2	LPS	1	M	0.05	40	5.91519	33.3383	21.2789	M	1.05386	4.88576	2.73724	1.9191	1.29599
140623_1a_SAL	23-5	62	0.00983	12.3	0.756806	0.00756806	1	SAL	0	M	0.05	40	4.96848	50.0946	26.1083	M	0.656507	5.96271	2.7933	2.35943	1.74583
140702_2b_SAL	24-6	71	0.01121	12.36	0.858862	0.00858862	2	SAL	0	M	0.05	40	5.07616	47.4377	26.6402	M	0.591033	4.93229	2.51077	1.95486	1.50281
140919_1a_SAL	27-4	62	0.00915	12.02	0.720863	0.00720863	1	SAL	0	M	0.05	40	6.55601	56.0528	37.1482	M	0.909467	6.86632	4.24383	2.7147	2.01877
141003_1a_SAL	27-8	76	0.00781	11.26	0.656824	0.00656824	1	SAL	0	M	0.05	40	4.54621	64.3101	24.7699	M	0.69215	9.09893	3.07901	3.59688	2.65577
141010_1b_SAL	28-2	55	0.00912	12.03	0.717902	0.00717902	1	SAL	0	M	0.05	40	3.22711	22.957	14.5127	M	0.449519	2.74827	1.57203	1.08784	0.776585
141017_2b_SAL	28-4	62	0.00861	10.89	0.748706	0.00748706	2	SAL	0	M	0.05	40	5.12307	54.1579	28.8823	M	0.684257	6.54928	3.17337	2.35023	1.56074
141023_1b_SAL	28-5	68	0.0097	11.19	0.820876	0.00820876	1	SAL	0	M	0.05	40	3.33487	33.2046	17.6614	M	0.406258	3.63877	1.74528	1.44021	1.02817
141024_1a_SAL	28-6	69	0.0078	12.01	0.615018	0.00615018	1	SAL	0	M	0.05	40	3.82879	31.0673	17.6042	M	0.622549	4.4289	2.23984	1.76098	1.15528
141024_2a_SAL	28-6	69	0.00843	11.96	0.667471	0.00667471	2	SAL	0	M	0.05	40	3.23971	26.6114	15.1138	M	0.485371	3.50153	1.77897	1.38057	0.913655
140624_1a_LPS	24-1	63	0.01019	12.68	0.761011	0.00761011	1	LPS	1	M	0.05	40	8.61882	68.4997	38.5874	M	1.13255	7.86859	3.93799	3.10932	2.18795
140626_1d_LPS	24-3	65	0.00802	11.35	0.669136	0.00669136	1	LPS	1	M	0.05	40	7.47035	64.7755	34.6883	M	1.11642	8.56405	4.06763	3.38821	2.3101
140701_2_LPS	24-5	70	0.01121	12.36	0.858862	0.00858862	2	LPS	1	M	0.05	40	5.15364	63.3222	30.3176	M	0.600054	6.77275	2.92992	2.64718	1.85387
140703_1a_LPS	24-7	72	0.00869	13.63	0.603754	0.00603754	1	LPS	1	M	0.05	40	7.57525	53.8528	32.1821	M	1.25469	7.66497	4.07565	3.03369	2.23565
140616_2a_SAL	23_2	55	0.00879	11.89	0.700073	0.00700073	2	SAL	0	M	0.05	40	4.72087	40.2959	24.2184	M	0.67434	5.08162	2.78508	1.9255	1.57201
140617_1a_LPS	23_1	56	0.00827	13.17	0.594642	0.00594642	1	LPS	1	M	0.05	40	7.92336	55.4992	32.4161	M	1.33246	8.00074	4.11891	3.16553	2.30167
140619_1a_LPS	23_4	58	0.00955	9.04	1.00039	0.0100039	1	LPS	1	M	0.05	40	5.24773	48.1417	25.4901	M	0.524567	4.2877	2.02344	1.69581	1.21167
140221_1a_LPS	21-4	94	0.01942	14.35	1.28154	0.0128154	1	LPS	1	M	0.05	40	5.77438	30.272	19.9461	M	0.45058	1.91157	1.10583	0.48724	0.356585
140228_2a_LPS	21-6	101	0.01942	14.35	1.28154	0.0128154	2	LPS	1	M	0.05	40	6.03396	26.2813	17.644	M	0.470835	1.57992	0.905941	0.514402	0.386139
130814_1b_SAL	15_4	58	0.01194	11.2	1.00954	0.0100954	1	SAL	0	M	0.05	40	4.90025	40.0459	25.6042	M	0.485396	3.48136	2.05083	0.687497	0.464004
130826_1b_LPS	15_2	70	0.01275	13	0.928759	0.00928759	1	LPS	1	M	0.05	40	2.2174	30.4455	18.1197	M	0.238749	3.03934	1.71221	0.600877	0.412401
130920_1b_LPS	15_1	95	0.0108	13	0.786713	0.00786713	1	LPS	1	M	0.05	40	3.83304	29.72	18.3431	M	0.487222	3.29052	1.84439	0.838866	0.566519
130927_1a_LPS	16_6	102	0.01341	11.3	1.12379	0.0112379	1	LPS	1	M	0.05	40	3.98765	21.943	14.1301	M	0.354838	1.59775	0.902517	0.40779	0.302351
130930_2a_SAL	16_4	105	0.01291	13.1	0.933235	0.00933235	2	SAL	0	M	0.05	40	2.23277	18.9219	12.1417	M	0.239251	1.78831	1.06179	0.460281	0.333358
131011_1a_LPS	16_8	116	0.00974	11.9	0.775083	0.00775083	1	LPS	1	M	0.05	40	4.16314	38.2177	21.7517	M	0.537122	4.39367	2.26925	1.11997	0.708803

## Sheet: MaximumTetanicContractionData
Date of Expt	Animal #	Muscle #	Drug	Sex	DOB	Age	BW Day of Expt	BW Day of Inj	Change BW	Muscle Wt	Lo	CSA (mm2)	CSA (cm2)	Spleen Wt		Max Tet Force (mN)	Normalized MT (mN/cm2)
2013-08-14	15-4	1b	SAL	M	2013-06-17	58		22.1		0.01194	11.2	1.00954	0.010095	0.06006
2013-08-26	15-2	1b	LPS	M	2013-06-17	70	21.1	23.7	2.6	0.01275	13	0.928759	0.009288	0.06949
2013-09-20	15-1	1b	LPS	M	2013-06-17	95	23.7	26.4	2.7	0.0108	13	0.786713	0.007867	0.07588		133.45	16.96
2013-09-27	16-6	1a	LPS	M	2013-06-17	102	23.9	26.2	2.3	0.01341	11.3	1.12379	0.011238	0.06679		153.94	13.7
2013-09-30	16-4	2a	SAL	M	2013-06-17	105	26	26.3	0.3	0.01291	13.1	0.933235	0.009332	0.0574
2013-10-11	16-8	1a	LPS	M	2013-06-17	116	25.2	27.1	1.9	0.00974	11.9	0.775083	0.007751	0.067		59.92	7.73
2014-02-21	21-4	1a	LPS	M	2013-11-19	94	23.2	25.8	2.6	0.01942	14.35	1.28154	0.012815	0.07776
2014-02-28	21-6	2	LPS	M	2013-11-19	101	23.7	25.5	1.8				0			132.63
2014-06-16	23-2	2a	SAL	M	2014-04-22	55	20.5	21.2	0.7	0.00879	11.89	0.700073	0.007001	0.05184		130.7	18.67
2014-06-17	23-1	1a	LPS	M	2014-04-22	56	19.7	22.3	2.6	0.00827	13.17	0.594642	0.005946	0.08369
2014-06-19	23-4	1a	LPS	M	2014-04-22	58	21.2	22.7	1.5	0.00955	9.04	1.00039	0.010004	0.07547		260.1	26
2014-06-23	23-5	1a	SAL	M	2014-04-22	62	21.5	21.4	-0.1	0.00983	12.3	0.756806	0.007568	0.0555
2014-06-24	24-1	1a	LPS	M	2014-04-22	63	19.8	22.5	2.7	0.01019	12.68	0.761011	0.00761	0.077
2014-06-26	24-3	1d	LPS	M	2014-04-22	65	19.8	22.2	2.4	0.00802	11.35	0.669136	0.006691	0.06676		137.48	20.55
2014-07-01	24-5	2	LPS	M	2014-04-22	70	20.2	22.8	2.6				0	0.063		105.53
2014-07-02	24-6	2b	SAL	M	2014-04-22	71	22.3	22.2	-0.1	0.01121	12.36	0.858862	0.008589	0.05518		171.61	19.98
2014-07-03	24-7	1a	LPS	M	2014-04-22	72	17.6	20.2	2.6	0.00869	13.63	0.603754	0.006038	0.05391
2014-09-19	27-4	1a	SAL	M	2014-07-19	62	20.7	20.4	-0.3	0.00915	12.02	0.720863	0.007209	0.01003
2014-10-03	27-8		SAL	M	2014-07-19	76	22.5	22.3	-0.2	0.00781	11.26	0.656824	0.006568	0.04566
2014-10-10	28-2	1b	SAL	M	2014-08-16	55	19.9	19.9	0	0.00912	12.03	0.717902	0.007179	0.056
2014-10-17	28-4	2b	SAL	M	2014-08-16	62	20.8	20.5	-0.3	0.00861	10.89	0.748706	0.007487	0.06276		203.58	27.19
2014-10-23	28-5	1a	SAL	M	2014-08-16	68	23.5	23.6	0.1	0.0097	11.19	0.820876	0.008209	0.06137
2014-10-23	28-5	1b	SAL	M	2014-08-16	68	23.5	23.6	0.1	0.0097	11.19	0.820876	0.008209	0.06137
2014-10-24	28-6	1a	SAL	M	2014-08-16	69	20.6	20	-0.6	0.0078	12.01	0.615018	0.00615	0.05234
2014-10-24	28-6	2a	SAL	M	2014-08-16	69	20.6	20	-0.6	0.00843	11.96	0.667471	0.006675	0.05234		106.03	15.88
2014-10-24	28-6	2b	SAL	M	2014-08-16	69	20.6	20	-0.6	0.00843	11.96	0.667471	0.006675	0.05234		114.87	17.21
2016-02-05	32-1	1b	SAL	M	2015-12-19	48	20.2			0.00759	11.84	0.607052	0.006071	0.0639
2016-02-05	32-1	1c	SAL	M	2015-12-19	48							0
2016-02-10	32-2	1c	SAL	M	2015-12-19	53	18.8	19.1	0.3	0.0076	11.64	0.618296	0.006183	0.05139		128.68	20.81
2016-02-17	32-4	2c	SAL	M	2015-12-19	60	20	20.2	0.2	0.00925	10.47	0.836626	0.008366	0.05423		215.25	25.73
2016-02-24	32-6	2a	SAL	M	2015-12-19	67	23.8	23.4	-0.4	0.00921	13.49	0.646523	0.006465	0.05586		136.85	21.17
2016-02-26	32-7	2c	SAL	M	2015-12-19	69	20.3	19.1	-1.2	0.00842	12.31		0	0.06159		211.6
2016-03-02	32-8	1b	LPS	M	2015-12-19	74	20.1	22.1	2	0.011	12.3	0.846883	0.008469	0.06777		44.93
2016-03-02	32-8	1c	LPS	M	2015-12-19	74							0			44.93
2016-03-02	32-8	2c	LPS	M	2015-12-19	74				0.012	13.77	0.825246	0.008252			22.39
2016-03-09	32-10	1b	LPS	M	2015-12-19	81	20.1	22.1	2	0.012	11.29	1.00652	0.010065	0.01756
2016-03-09	32-10	1c	LPS	M	2015-12-19	81							0
2016-03-09	32-10	2d	LPS	M	2015-12-19	81				0.007	11.81	0.561286	0.005613			177.38	31.6
2013-07-09	9-4	2a	SAL	F	2013-05-03	67	19.2			0.00846	10.9	0.734987	0.00735	0.072
2013-07-11	9-6	1a	LPS	F	2013-05-03	69	17.3	19.3	2	0.00929	10	0.879735	0.008797	0.06485		132.84	15.1
2013-07-11	9-6	2a	LPS	F	2013-05-03	69	17.3	19.3	2	0.00981	11.1	0.836916	0.008369	0.06485
2013-07-16	10-3	2a	SAL	F	2013-05-03	74	19.7	19.8	0.1	0.00864	10	0.818182	0.008182	0.06734
2013-07-23	10-6	1a	LPS	F	2013-05-03	81	16	18	2	0.00869	12.2	0.674522	0.006745	0.05934		100.95	14.97
2014-07-10	25-2	1a	SAL	F	2014-05-12	59	19	19.4	0.4	0.00953	11.13	0.810837	0.008108	0.05487		306.12	37.75
2014-07-14	25-4	1d	LPS	F	2014-05-12	63	16.2	18.7	2.5	0.01003	12.31	0.771576	0.007716	0.07577		128.96	16.71
2014-07-23	26-3	2a	SAL	F	2014-05-12	72	18.6	18.7	0.1	0.00942	11.21	0.795759	0.007958	0.05543		27.17
2014-07-24	26-4	2a	LPS	F	2014-05-12	73	16.7	19.6	2.9	0.00659	11.96	0.521783	0.005218	0.06651		216.18	41.43
2015-02-04	29-2	2a	LPS	F	2014-12-07	59	16.3	17.1	0.8	0.00762	12.18	0.592439	0.005924	0.05867		58.11	9.81
2015-02-06	29-3	1a	SAL	F	2014-12-07	61	18	16.1	-1.9	0.00586	11.07	0.501287	0.005013	0.07539
2015-02-11	29-4	1b	SAL	F	2014-12-07	66	16.7	15.9	-0.8	0.00897	11.73	0.724153	0.007242			94.86	13.1
2015-02-13	29-5	1b	LPS	F	2014-12-07	68	15.3	17.3	2	0.00537	11.05	0.460202	0.004602	0.06526		108.63	23.61
2015-02-13	29-5	1e	LPS	F	2014-12-07	68	15.3	17.3	2	0.00537	11.05	0.460202	0.004602	0.06526		108.63	23.61
2015-02-18	29-6	1b	LPS	F	2014-12-07	73	16.4	18.3	1.9	0.00613	10.9	0.532562	0.005326
2015-03-04	30-1	2a	SAL	F	2015-01-03	60	18.4	18.8	0.4	0.0057	11.64	0.463722	0.004637			132.93	28.67
2015-03-11	30-3	1a	SAL	F	2015-01-03	67	19	18.7	-0.3	0.0096	12.15	0.748223	0.007482	0.06521		90.05	12.04
2015-03-11	30-3	1b	SAL	F	2015-01-03	67	19	18.7	-0.3	0.0096	12.15	0.748223	0.007482	0.06521		90.05	12.04
2015-03-13	30-4	1c	LPS	F	2015-01-03	69	15.8	17.7	1.9	0.00649	8.87	0.692879	0.006929	0.06674		89.57	12.93
2015-03-20	30-8	1b	LPS	F	2015-01-03	76	17.9	19.6	1.7	0.00714	10.82	0.624895	0.006249			136.37	21.82
2015-03-20	30-8	2b	LPS	F	2015-01-03	76	17.9	19.6	1.7	0.007	12.39	0.535011	0.00535			172.84	32.31
2016-06-17	L1	1a	LPS	F	2016-04-19	59	16	18.6	2.6	0.00629	9.92	0.600448	0.006004	0.088		173.15	28.84
2016-06-17	L1	1c	LPS	F	2016-04-19	59	16	18.6	2.6	0.00629	9.92	0.600448	0.006004	0.088		173.15	28.84
2016-06-17	L1	2a	LPS	F	2016-04-19	59	16	18.6	2.6	0.0079	11.25	0.664982	0.00665	0.088
2016-06-17	L1	2d	LPS	F	2016-04-19	59	16	18.6	2.6	0.0079	11.25	0.664983	0.00665	0.088		139.08	20.92
2016-06-21	L2	1c	LPS	F	2016-04-19	63	16.3	18.1	-1.8	0.00808	10.96	0.698131	0.006981			119.12	17.06
2016-06-22	S1	1b	SAL	F	2016-04-19	64	18.2	18.4	0.2	0.00553	11.86	0.441547	0.004415	0.07436		153	34.65
2016-06-22	S1	2a	SAL	F	2016-04-19	64	18.2	18.4	0.2	0.0051	11.86	0.407213	0.004072	0.07436		184.19	45.23
2016-06-23	L3	2b	LPS	F	2016-04-19	65	17.1	18.7	1.6	0.00902	12.64	0.675765	0.006758	0.07733
2016-06-24	S2	1a	SAL	F	2016-04-19	66	18.8	18.4	-0.4	0.00864	11.12	0.735775	0.007358	0.05916		204.46	27.79
2016-06-24	S2	1b	SAL	F	2016-04-19	66	18.8	18.4	-0.4	0.00864	11.12	0.735775	0.007358	0.05916		204.46	27.79
2016-06-24	S2	2c	SAL	F	2016-04-19	66	18.8	18.4	-0.4	0.00735	9.41	0.739663	0.007397	0.05916		35.63
2016-06-29	L4	1a	LPS	F	2016-04-19	71	16.4	18.3	1.9	0.00643	10.29	0.591741	0.005917	0.07629
2016-07-05	L5	1a	LPS	F	2016-04-19	77	18.1	20.4	2.3	0.00817	11.41	0.678067	0.006781	0.0761
2016-07-05	L5	2a	LPS	F	2016-04-19	77	18.1	20.4	2.3	0.01024	9.97	0.972615	0.009726	0.0761		79.14	8.14
2016-07-05	L5	2b	LPS	F	2016-04-19	77	18.1	20.4	2.3	0.01024	9.97	0.972615	0.009726	0.0761		79.14	8.14
2016-07-06	S3	1b	SAL	F	2016-04-19	78	19.6	19.4	-0.2	0.00734	11.34	0.612942	0.006129	0.07069		233.62	38.11
2016-07-06	S3	1c	SAL	F	2016-04-19	78	19.6	19.4	-0.2	0.00734	11.34	0.612942	0.006129	0.07069		233.62	38.11
2016-07-06	S3	2a	SAL	F	2016-04-19	78	19.6	19.4	-0.2	0.00862	10.13	0.805812	0.008058	0.07069		94.47	11.72
2016-07-06	S3	2b	SAL	F	2016-04-19	78	19.6	19.4	-0.2	0.00862	10.13	0.805812	0.008058	0.07069		94.47	11.72
2016-07-07	S4	1b	SAL	F	2016-04-19	79	19.5	19.6	0.1	0.01019	11.5	0.839097	0.008391	0.07204
2016-07-07	S4	2a	SAL	F	2016-04-19	79	19.5	19.6	0.1	0.00903	13.04	0.655762	0.006558	0.07204		66.54	10.15

## Sheet: H Reflex Data
animal number	sex	sex	condition/drug	condition/drug	Hmax/Mmax	M latency (seconds)	H latency (seconds)	M latency (milliseconds)	H latency (milliseconds)	Threshold for Mmax (Hz)	Threshold for Hmax (Hz)	good file or bad file?	birthdate	age	BW day of inj	BW day of exp	BW change (EXP-INJ)	note
mouse 46-5	M	1	4	LPS	0.192824	0.00279994	0.00620003	2.79994	6.20003	7	3	good	2015-05-15	101	27.9	25.5	-2.4
mouse 47-5	M	1	4	LPS	0.511682	0.00349994	0.00690002	3.49994	6.90002	1.3	7	good	2015-05-15	101	24.9	22.4	-2.5
mouse 48-6	M	1	4	LPS	0.217067	0.00320001	0.00739999	3.20001	7.39999	6	6	good	2015-07-07	58	22.6	22.4	-0.2
mouse 51	M	1	4	LPS	0.201021	0.00279994	0.00594993	2.79994	5.94993	2	6	good	2015-07-07	63	22.4	21.9	-0.5
mouse 53	M	1	4	LPS	0.241572	0.00289984	0.00649996	2.89984	6.49996	8	3	good	2015-07-07	69	23.5	20.9	-2.6
mouse 55	M	1	4	LPS	0.133701	0.00309987	0.00599999	3.09987	5.99999	1.5	7	good	2015-07-07	70	21.8	19.7	-2.1
621A mouse 10	M	1	4	LPS	0.493953	0.00314999	0.00639987	3.14999	6.39987	1.3	7	good			25.61	22.44	-3.17
949A mouse 7	M	1	4	LPS	0.408546	0.00344992	0.00664997	3.44992	6.64997	5	5	good			22.25	22.3	0.05
mouse 45	M	1	4	LPS	0.674111	0.00289984	0.00640006	2.89984	6.40006	8	6	good	2015-05-15	96	24.4	22.1	-2.3
949A mouse 1	M	1	4	LPS	0.323071	0.00355005	0.00670004	3.55005	6.70004						19.3	18.6	-0.7
984B Mouse 3	M	1	4	LPS	0.577882	0.0040998	0.0076	4.0998	7.6						25.7	23.62	-2.08
984B Mouse 4	M	1	4	LPS	0.465297	0.00374985	0.00650001	3.74985	6.50001						24.9	23.4	-1.5
Mouse 34 LF	M	1	1	SAL	0.283	0.0035	0.0071	3.5	7.1				2015-05-15	67	23	23.8	0.8
Mouse 35 LF	M	1	1	SAL	0.157	0.0045	0.008	4.5	8				2015-05-15	68	23.6	23.2	-0.4
Mouse 36 LF	M	1	1	SAL	0.309	0.0035	0.0063	3.5	6.3				2015-05-15	68	23.6	23.2	-0.4
Mouse 38 RF	M	1	1	SAL	0.282	0.0041	0.0082	4.1	8.2				2015-05-15	73	22	22.5	0.5
Mouse 39 LF	M	1	1	SAL	0.161	0.0031	0.0066	3.1	6.6				2015-05-15	81	22	21.5	-0.5
Mouse 40 RF	M	1	1	SAL	0.334	0.0032	0.0055	3.2	5.5				2015-05-15	81	22.5	21.9	-0.6
Mouse 41 RF	M	1	1	SAL	0.285	0.0027	0.0061	2.7	6.1				2015-05-15	82	22.9	22.4	-0.5
Mouse 42 LF	M	1	1	SAL	0.307	0.0028	0.0054	2.8	5.4				2015-05-15	83	24.7	24.6	-0.1
Mouse 49 LF	M	1	1	SAL	0.386	0.0029	0.0075	2.9	7.5				2015-05-15	112	22.7	23.1	0.4
Mouse 50 LF	M	1	1	SAL	0.173	0.0027	0.0083	2.7	8.3				2015-05-15	112	22.7	22.2	-0.5
621A mouse 6	M	1	1	SAL	0.537502	0.00374985	0.00639987	3.74985	6.39987	6	6	good			22.8	22.95	0.15
970A mouse 4	M	1	1	SAL	0.434695	0.00364995	0.00690007	3.64995	6.90007	3	3	good			25.8	25.7	-0.1
970A Mouse 5	M	1	1	SAL	0.543887	0.00339985	0.0065999	3.39985	6.5999	1	1	good			25.8	25.35	-0.45
999A 5	F	2	1	SAL	0.327954	0.00320005	0.00620008	3.20005	6.20008	1.3	1.3	good file			18.4	18.1	-0.3
999A 10	F	2	1	SAL	0.12324	0.00379992	0.00699997	3.79991	6.99997	1	1.5	good file			19.2	19.13	-0.07
999A 1	F	2	1	SAL	0.205743	0.00370002	0.00699997	3.70002	6.99997	5	5	ok			19.2	19.6	0.4
mouse 6	F	2	1	SAL	0.170724	0.00309987	0.00699992	3.09987	6.99992	1.5	5	good file	2015-07-26	64	18.4	18.7	0.3
mouse 5	F	2	1	SAL	0.404415	0.00324984	0.00669999	3.24984	6.69999	3	3	good file	2015-07-26	64	19.1	19.4	0.3
mouse 4	F	2	1	SAL	0.372492	0.00334997	0.00675006	3.34997	6.75006	1.5	1.5	good file	2015-07-26	61	18.4	19.2	0.8
mouse 2	F	2	1	SAL	0.469719	0.00235004	0.00599999	2.35004	5.99999	3	2	ok	2015-07-26	59	18.1	17.8	-0.3
999A Mouse 6	F	2	1	SAL	0.258496	0.00399995	0.0072	3.99995	7.2	3	3	ok			16.8	16.75	-0.05
mouse 8	F	2	1	SAL	0.516497	0.00279994	0.00620003	2.79994	6.20003	5	5	good file	2015-07-26	68	18.7	16.9	-1.8
Mouse 1	F	2	1	SAL	0.15	0.0029	0.0067	2.9	6.7				2015-07-26	58	18	17.5	-0.5
Mouse 3	F	2	1	SAL	0.22	0.0033	0.0072	3.3	7.2				2015-07-26	61	17.7	17.6	-0.1
Mouse 12	F	2	1	SAL	0.12	0.0021	0.0068	2.1	6.8				2015-07-26	78	19.2	20	0.8
Mouse 13	F	2	1	SAL	0.7	0.0027	0.0059	2.7	5.9				2015-07-26	78	18.2	18.2	0
Mouse 17	F	2	1	SAL	0.15	0.0021	0.0061	2.1	6.1				2015-07-26	86	19.1	19	-0.1
999A 8	F	2	4	LPS	0.516518	0.00309992	0.00679994	3.09992	6.79994	1	3	good for 0.1, not 5			18.4	15.61	-2.79
Mouse 10-2	F	2	4	LPS	0.32876	0.00309987	0.00649996	3.09987	6.49996	1.5	1.5	good file	2015-07-26	84	17.8	15.8	-2
Mouse 11-2	F	2	4	LPS	0.386086	0.00314994	0.00640006	3.14994	6.40006	5	7	good file	2015-07-26	75	18.5	16.5	-2
Mouse 14	F	2	4	LPS	0.295036	0.00250001	0.00550003	2.50001	5.50003	5	1.5	good file	2015-07-26		17.7	16	-1.7
Mouse 15	F	2	4	LPS	0.296271	0.00270004	0.00565	2.70004	5.65	6	2	good file	2015-07-26	85	19.2	17.4	-1.8
Mouse 20-3	F	2	4	LPS	0.437473	0.00309987	0.00634999	3.09987	6.34999	2	2	good file	2015-07-26	92	20.3	19.4	-0.9
999A 7	F	2	4	LPS	0.573649	0.00349998	0.00670004	3.49998	6.70004	1	1	good file			18.08	15.6	-2.48
mouse 7	F	2	4	LPS	0.467	0.0038	0.0073	3.8	7.3				2015-07-26	65	19.4	17.3	-2.1
mouse 9	F	2	4	LPS	0.292	0.0027	0.0056	2.7	5.6				2015-07-26	71	16.9	15.6	-1.3
mouse 16	F	2	4	LPS	0.163	0.0031	0.0057	3.1	5.7				2015-07-26	85	19.3	17.4	-1.9
mouse 18	F	2	4	LPS	0.233	0.0022	0.0057	2.2	5.7				2015-07-26	92	20.6	18.9	-1.7
mouse 19	F	2	4	LPS	0.435	0.0023	0.006	2.3	6				2015-07-26	92	18.7	16.4	-2.3
mouse 999A 9	F	2	4	LPS	0.215538	0.00359988	0.00714993	3.59988	7.14993						19	16.9	-2.1
